# Supplementary material for: Common psychosocial stressors in middle-aged women related to longstanding distress and increased risk of Alzheimer's disease: a 38-year longitudinal population study
Source: PubMed Central journal article supplement — BMJ Open. 2013 Aug 31;3(9):e003142. doi: 10.1136/bmjopen-2013-003142 (PMC3787482; doi:10.1136/bmjopen-2013-003142), 2013-08-31
Supplement: bmjopen-2013-003142.draft_revisions.pdf [file bmjopen-2013-003142.draft_revisions.pdf]

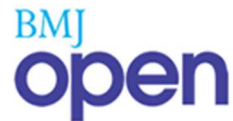

**Title: Common psychosocial stressors in middle-aged women related to longstanding distress and increased risk of Alzheimer's disease: a 38 year follow-up study**

|                                 |                                                                                                                                                                                                                                                                                                                                                                                                                                                                                                                                                                                                                                                                                                                                                                                                                                                                                                                                                                                                                   |
|---------------------------------|-------------------------------------------------------------------------------------------------------------------------------------------------------------------------------------------------------------------------------------------------------------------------------------------------------------------------------------------------------------------------------------------------------------------------------------------------------------------------------------------------------------------------------------------------------------------------------------------------------------------------------------------------------------------------------------------------------------------------------------------------------------------------------------------------------------------------------------------------------------------------------------------------------------------------------------------------------------------------------------------------------------------|
| Journal:                        | <i>BMJ Open</i>                                                                                                                                                                                                                                                                                                                                                                                                                                                                                                                                                                                                                                                                                                                                                                                                                                                                                                                                                                                                   |
| Manuscript ID:                  | bmjopen-2013-003142                                                                                                                                                                                                                                                                                                                                                                                                                                                                                                                                                                                                                                                                                                                                                                                                                                                                                                                                                                                               |
| Article Type:                   | Research                                                                                                                                                                                                                                                                                                                                                                                                                                                                                                                                                                                                                                                                                                                                                                                                                                                                                                                                                                                                          |
| Date Submitted by the Author:   | 30-Apr-2013                                                                                                                                                                                                                                                                                                                                                                                                                                                                                                                                                                                                                                                                                                                                                                                                                                                                                                                                                                                                       |
| Complete List of Authors:       | Johansson, Lena; Institute of Neuroscience and Physiology, Sahlgrenska Academy at G <sup>o</sup> teborg University, G <sup>o</sup> teborg, Swed<br>Guo, Xinxin; Institute of Neuroscience and Physiology, Sahlgrenska Academy at G <sup>o</sup> teborg University, G <sup>o</sup> teborg, Swed<br>Hällström, Tore; Neuroscience and Physiology, Psychiatry<br>Norton, Maria; Utah University, Department of Family Consumer and Human Development and Departments of Psychology<br>Waern, Margda; Institute of Neuroscience and Physiology, Sahlgrenska Academy at G <sup>o</sup> teborg University, G <sup>o</sup> teborg, Swed<br>Östling, Svante; Institute of Neuroscience and Physiology, Sahlgrenska Academy at G <sup>o</sup> teborg University, G <sup>o</sup> teborg, Swed<br>Skoog, Ingmar; Institute of Neuroscience and Physiology, Sahlgrenska Academy at G <sup>o</sup> teborg University, G <sup>o</sup> teborg, Swed<br>Bengtsson, Calle; , the Sahlgrenska Academy at University of Gothenburg,, |
| <b>Primary Subject Heading</b>: | Epidemiology                                                                                                                                                                                                                                                                                                                                                                                                                                                                                                                                                                                                                                                                                                                                                                                                                                                                                                                                                                                                      |
| Secondary Subject Heading:      | Epidemiology, Pathology                                                                                                                                                                                                                                                                                                                                                                                                                                                                                                                                                                                                                                                                                                                                                                                                                                                                                                                                                                                           |
| Keywords:                       | Old age psychiatry < PSYCHIATRY, EPIDEMIOLOGY, Dementia < NEUROLOGY, Neuropathology < NEUROLOGY                                                                                                                                                                                                                                                                                                                                                                                                                                                                                                                                                                                                                                                                                                                                                                                                                                                                                                                   |
|                                 |                                                                                                                                                                                                                                                                                                                                                                                                                                                                                                                                                                                                                                                                                                                                                                                                                                                                                                                                                                                                                   |

SCHOLARONE™  
Manuscripts

Common stressors in relation to longstanding distress and Alzheimer's disease

**Title page**

Title: Common psychosocial stressors in middle-aged women related to longstanding distress and increased risk of Alzheimer's disease: a 37 year longitudinal population study

Authors' names: Lena Johansson, Xinxin Guo, Tore Hällström, Maria C Norton, Margda Waern, Svante Östling, Calle Bengtsson, Ingmar Skoog

Address for each author: Neuropsychiatric Epidemiology Unit, Institute of Neuroscience and Physiology, Sahlgrenska Academy at Gothenburg University, Wallingsgatan 6, S-431 41 Mölndal, Sweden Lena Johansson researchers Xinxin Guo researcher, Tore Hällström professor emeritus, Margda Waern professor, Svante Östling associate professor, Ingmar Skoog professor Department of Clinical Neuroscience, Section for Psychiatry/Huddinge, Karolinska Institutet, Stockholm, Sweden Tore Hällström professor emeritus Department of Family Consumer and Human Development and Departments of Psychology, Utah State University, Logan, USA Maria Norton associate professor Sahlgrenska School of Public Health and Community Medicine, Section for Public Health Epidemiology, the Sahlgrenska Academy at University of Gothenburg, Gothenburg, Sweden Calle Bengtsson professor emeritus

Correspondence to: [lena.johansson@neuro.gu.se](mailto:lena.johansson@neuro.gu.se)

Common stressors in relation to longstanding distress and Alzheimer's disease

## Abstract

**Objective** To study the relation between psychosocial stressors, longstanding distress and incidence of dementia, in a sample of women followed from midlife to late-life.

**Design** Prospective longitudinal population study.

**Setting** The study is part of the Prospective Population Study of Women in Gothenburg, Sweden, which started in 1968 with subsequent follow-ups in 1974, 1980, 1992, 2000 and 2005.

**Participants** 800 women born in 1914, 1918, 1922 and 1930 who rated 18 psychosocial stressors (e.g. divorce, widowhood, work problems and illness in relative) at baseline 1968.

**Primary and secondary outcome measures:** Symptoms of distress were measured according to a standardised question at each study wave. Dementia was diagnosed according to DSM-III-R and Alzheimer's disease (AD) according to NINCD-ADRDA.

**Results** During the 37-years follow-up 153 women developed dementia (104 of those had AD). Number of psychosocial stressors in 1968 was associated (HR, 95% CI) with higher incidence of dementia (1.15, 1.04-1.27) and AD (1.20, 1.07-1.35) between 1968 and 2005, in multivariate Cox regressions. Number of psychosocial stressors in 1968 was also associated (OR, 95% CI) with distress in 1968 (1.48, 1.32-1.67), 1974 (1.31, 1.17-1.46), 1980 (1.27, 1.11-1.45), 2000 (1.39, 1.14-1.70) and 2005 (1.35, 1.02-1.79), in multivariate logistic regressions. Number of psychosocial stressors (HR 1.17, 95% CI 1.03-1.33) and longstanding distress (1968-1974-1980) (HR 1.58, 95% CI 1.03-2.45) were independently associated with AD.

**Conclusions** Our study shows that common psychosocial stressors may have severe and longstanding physiological and psychological consequences. It needs to be elucidated whether more intensive interventions such as stress management and behavioral therapy should be initiated in individuals who have experienced psychosocial stressors.

Common stressors in relation to longstanding distress and Alzheimer's disease

### Article summary

#### Article focus

To study the relation between psychosocial stressors, longstanding distress and incidence of dementia, in a sample of women followed over 37 years, from mid- to late-life.

#### Key messages

The study shows that the number of psychosocial stressors, measured in middle-aged women, was related to distress and incidence of AD almost four decades later.

The study also shows that the association between number of psychosocial stressors and AD was independent of longstanding perceived distress.

#### Strengths and limitations of this study

The strengths of this study include midlife report of psychosocial stressors occurring long before dementia onset, the long follow-up period, the representative population and that multiple sources of information were used to detect and diagnose dementia.

The rating of stressors was related to the last year for some stressors and at any time before 1968 for other stressors. Some stressors were of a short duration, while others were chronic and lasting for many years. We only have information on a limited number of psychosocial stressors in our population. Individuals have different capacities to cope with stress and thus react differently when exposed to the same stressor. We did not have an individual weighting of the included stressors.

Common stressors in relation to longstanding distress and Alzheimer's disease

## Introduction

Experiences of severe psychological stressors in adulthood (e.g. combat<sup>1</sup>, natural disasters<sup>2</sup> and the Holocaust<sup>3</sup>) are known to influence mental and physical health decades later. More mild psychosocial stressors are common and could be regarded as part of normal life. The long-term consequences of these more common stressors remain unclear. Epidemiological studies in the elderly with follow-ups of less than 10 years have reported that history of early parental death,<sup>4-6</sup> death of spouse<sup>7</sup> and psychosocial risk factors in childhood<sup>6</sup> increase the risk of dementia or Alzheimer's disease (AD). One explanation for the associations may be that traumatic experiences give rise to longstanding chronic distress many years after the trauma. This may lead to a cumulative burden to the brain with dysregulation in neuroendocrine systems.<sup>8-10</sup> A study among Holocaust survivors found that higher levels of stress hormones remained decades after the traumatic experiences.<sup>8</sup>

We have previously reported that longstanding distress in midlife leads to long-term consequences decades later, such as increased risk of dementia, AD<sup>11</sup> and structural brain changes<sup>12</sup>. To our knowledge, no population study has examined if number of psychosocial stressors in midlife increase the risk of dementia in late-life, and whether this is modified by longstanding distress.

The aim of this study was to examine whether common psychosocial stressors in midlife were related to distress, late-life dementia and AD, in women followed over 38 years. We further aimed to examine whether experiences of psychosocial stressors mediate the previously reported association between longstanding midlife distress and AD.

Common stressors in relation to longstanding distress and Alzheimer's disease

## Methods

### Study population

This study is part of the Prospective Population Study of Women in Gothenburg, Sweden<sup>13 14</sup> which was initiated in 1968 with an examination of 1462 women (participation rate 90%) born in 1908, 1914, 1918, 1922 and 1930. The individuals were systematically sampled from the Swedish Population Registry based on specific birth dates in order to yield a representative sample at the ages studied. Follow-ups were performed in 1974, 1980, 1992, 2000 and 2005 with participation rates among survivors of 91%, 83%, 70%, 71% and 70% respectively. The Ethics Committee of Gothenburg University approved the study and informed consent was obtained from all participants, in accordance with the provision of the Helsinki Declaration.

The present study included a subsample of 800 women who were systematically selected for a psychiatric examination in 1968. The women were aged 38 years (n=111), 46 years (n=309), 50 years (n=290) and 54 years (n=90). Among them, 713 participated in the follow-up examination in 1974, 639 in 1980, 472 in 1992, 368 in 2000 and 296 in 2005. Losses were mainly due to death.

### Assessment of psychosocial stressors

At baseline 1968, eighteen predefined psychosocial stressors were asked and rated by a psychiatrist during the psychiatric examination. These included: divorce, widowhood, serious problem in children (e.g. physical illness, death and abuse), extramarital childbirth, mental illness in spouse or first degree relative, alcohol abuse in spouse or first degree relative, physical illness or social problems related to husband, receiving help from social-security, problem related to husband's or own work (e.g. lost work) and limited social network. Some

1  
2  
3  
4  
5  
6  
7  
8  
9  
10  
11  
12  
13  
14  
15  
16  
17  
18  
19  
20  
21  
22  
23  
24  
25  
26  
27  
28  
29  
30  
31  
32  
33  
34  
35  
36  
37  
38  
39  
40  
41  
42  
43  
44  
45  
46  
47  
48  
49  
50  
51  
52  
53  
54  
55  
56  
57  
58  
59  
60

Common stressors in relation to longstanding distress and Alzheimer's disease of the stressors (physical illness, mental illness and alcohol abuse in spouse; serious problem and mental illness in child; work related problems and limited social network) were rated in the last year before examination in 1968. The others were rated as occurring at any time prior to the examination in 1968.

### Assessment of distress

Symptoms of distress were rated according to a standardized question in 1968, 1974, 1980, 2000 and 2005. The question was worded identically at each examination; "Have you experienced any period of distress (one month or longer) in relation to circumstances in everyday life, such as work, health or family situation? Distress refers to feelings of irritability, tension, nervousness, fear, anxiety or sleep disturbances." Participants were asked to choose between; 0=Have never experienced any period of distress; 1=Have experienced period/s of distress more than five years ago; 2=Have experienced one period of distress during the last five years; 3=Have experienced several periods of distress during the last five years; 4=Have experienced constant distress during the last year; or 5=Have experienced constant distress during the last five years. In the present study, distress is defined as a rating of 3 to 5.

### Psychiatric examinations

The psychiatric examinations were performed in 1968, 1974, 1980 and 1992 by psychiatrists and in 2000 and 2005 by experienced psychiatric research nurses. The examinations were semi-structured and included a comprehensive neuropsychiatric examination and an extensive battery of neuropsychiatric tests.<sup>15</sup> Close informant interviews were performed in 1992, 2000 and 2005. These included questions about changes in behaviour and intellectual functions and, in cases of dementia, age of onset and disease course.<sup>15</sup> Medical records were collected

1 Common stressors in relation to longstanding distress and Alzheimer's disease  
2  
3 from all inpatient and outpatient departments and general practitioners' offices in Gothenburg.  
4  
5 The Swedish Hospital Discharge Registry provided diagnostic information for all individuals  
6  
7 discharged from hospitals on a nationwide basis since 1978.  
8  
9

### 10 11 **Diagnosis of dementia**

12  
13 The diagnosis of dementia was based on information from psychiatric examinations, close  
14  
15 informant interviews, medical record examinations and the Swedish Hospital Discharge  
16  
17 Registry. The diagnostic procedures have been described in detail previously.<sup>15</sup> Dementia  
18  
19 diagnosis at each examination was made according to the Diagnostic and Statistical Manual of  
20  
21 Mental Disorders (DSM-III-R) based on the combined information from the psychiatric  
22  
23 examination and the close informant interview. Dementia diagnoses for individuals lost to  
24  
25 follow-up were based on information from medical records evaluated by geriatric  
26  
27 psychiatrists in consensus conferences, and information from the Swedish Hospital Discharge  
28  
29 Registry.<sup>16</sup>  
30  
31  
32  
33  
34  
35

36 AD was diagnosed according to the criteria of the National Institute of Neurological and  
37  
38 Communicative Disorders and Stroke and the Alzheimer's Disease and Related Disorders  
39  
40 Association (NINCDS-ADRDA).<sup>17</sup> The criteria for vascular dementia (VaD) were similar to  
41  
42 the criteria proposed by the National Institute of Neurological Disorders and Stroke and the  
43  
44 Association Internationale pour la Recherche et l'Enseignement en Neurosciences (NINDS-  
45  
46 AIREN).<sup>18</sup> VaD was thus diagnosed when there was a temporal relationship (within 1 year)  
47  
48 between a history of acute focal neurological symptoms and signs (hemiparesis or motor  
49  
50 aphasia) and the first symptoms of dementia. Other dementias were diagnosed when other  
51  
52 causes were likely to have caused the dementia. Person-years were calculated from the date of  
53  
54 the baseline examination to (a) the time of dementia onset; (b) the date of death; (c) the date  
55  
56  
57  
58  
59  
60



1 Common stressors in relation to longstanding distress and Alzheimer's disease

2  
3 of the last follow-up examination for participants in 2005; or (d) December 31, 2006 for  
4  
5 surviving drop-outs.  
6  
7

### 8 9 **Potential confounders and mediators**

10 Information on education, socioeconomic status, marital status, work status, blood pressure,  
11  
12 antihypertensive medication use, coronary heart disease (CHD), diabetes mellitus, stroke,  
13  
14 waist and hip circumferences, cigarette smoking and wine consumption was obtained at the  
15  
16 examination in 1968. Education was dichotomised as compulsory (6 years for those born  
17  
18 1914-1922 and 7 years for those born 1930) versus more than compulsory education.  
19  
20

21 Socioeconomic status was based on husband's occupation for married women, and own  
22  
23 occupation for unmarried women and was defined as higher middle, lower middle, skilled  
24  
25 workers and unskilled workers.<sup>19</sup> Marital status was classified as married and/or co-habiting  
26  
27 versus single. Work status was measured as full-time work and/or part-time work versus no  
28  
29 work outside home. Hypertension was defined as systolic blood pressure of 160 mmHg or  
30  
31 more, and/or diastolic blood pressure 95 mmHg or more and/or taking antihypertensive  
32  
33 medication. CHD was defined as fulfilling one or more of the following criteria: angina  
34  
35 pectoris according to the Rose criteria,<sup>20</sup> documented history of myocardial infarction; ECG-  
36  
37 evidence of ischemia, i.e. complete left bundle branch block or major Q-waves; pronounced  
38  
39 ST-depression and/or negative T-waves.<sup>21</sup> Diabetes mellitus was defined as a diagnosis told  
40  
41 by a doctor, death certificates, being on anti-diabetes drugs or having two fasting blood  
42  
43 glucose values of 7.0 mmol/l or more. Stroke was diagnosed based on information from the  
44  
45 examinations and the Swedish Hospital Discharge Registry. Waist-to-hip ratio was calculated  
46  
47 as the ratio of waist and hip circumferences, measured to the nearest 0.5 cm. Cigarette  
48  
49 smoking was defined as never, former or current smoker. Wine consumption was classified as  
50  
51 none, less than once weekly and once weekly or more.  
52  
53  
54  
55  
56  
57  
58  
59  
60

Common stressors in relation to longstanding distress and Alzheimer's disease

### Statistical analyses

Logistic regressions were used to analyse the associations between number of psychosocial stressors in 1968 and report of distress in 1968, 1974, 1980, 2000 and 2005. The results are presented as odds ratios (ORs) and 95% confidence intervals (CIs) in two separate models. The first model adjusts for age only. The second model adjusts for age, education, socioeconomic status, marital status, work status, hypertension, CHD, stroke, diabetes mellitus, waist-to-hip ratio, smoking and wine consumption.

Cox regressions were used to study the association between number of psychosocial stressors and incidence of dementia and dementia subtypes. Associations are presented as hazard ratios (HRs) and 95% CIs, adjusting for the same covariates as listed above. A third model was added which also included longstanding midlife distress (i.e. distress in all examinations 1968-1974-1980) as a covariate.

We also examined the associations between psychosocial stressors and dementia onset before and after age 75. The association between stressors and dementia was further studied in a subsample excluding women whose parents had mental illness to minimize the influence of psychiatric heredity.

### Results

Baseline characteristics of the 800 participants are given in Table 1. The proportion of women who reported specific life stressors in 1968 are shown in Table 2. Twenty-five percent of the women reported one psychosocial stressor, 23% reported two stressors, 20% three stressors and 16% four or more stressors. The most frequently reported psychosocial stressor was mental illness in first degree relative (mother 27 %, father 19% and sibling 32%).

Common stressors in relation to longstanding distress and Alzheimer's disease

Four hundred and twenty five participants died during follow-up (mean age 79 years). From 1968 to 2006, 153 (19.1%) women developed dementia during 25,131 person-years of follow-up, including 104 with AD, 35 with VaD and 14 with other dementias. The mean time from the baseline examination in 1968 to dementia onset was 29 years (26 had dementia onset before 1992, 73 between 1992 and 2000 and 54 after 2000). Mean age of dementia onset was 78 years (45 had dementia onset before age 75 years and 108 after age 75 years).

Number of psychosocial stressors in 1968 was associated with distress in 1968, 1974, 1980, 2000 and 2005, after adjustment for potential confounders (Table 3). ORs were similar through all five examinations. Number of psychosocial stressors in 1968 was associated with longstanding midlife distress (i.e. distress in 1968-1974-1980) both in later born cohorts, born 1922 and 1930, (multiadjusted OR 1.32, 95% CI 1.14-1.52) and earlier born cohorts, born 1914 and 1918 (multiadjusted OR 1.58, 95% CI 1.30-1.94).

Number of psychosocial stressors in 1968 was associated with higher incidence of AD (HR 1.20, 95% CI 1.07-1.35) and all-type dementia (HR 1.15, 95% CI 1.04-1.27) after adjustment for multiple confounders (Table 4). The associations remained after further adjustment for longstanding distress (i.e. distress in 1968-1974-1980). In the final model, longstanding distress (HR 1.58, 95% CI 1.01-2.46) and number of psychosocial stressors (HR 1.17, 95% CI 1.02-1.33) were independently associated with AD. The association between number of psychosocial stressors and incidence of AD were similar in those with early onset AD (aged <75 years) (multiadjusted HR 1.25, 95% CI 1.02-1.54) and late onset AD (aged  $\geq$ 75 years) (multiadjusted HR 1.19, 95% CI 1.03-1.38). The association between number of psychosocial stressors and incidence of dementia remained when excluding women whose parents had

Common stressors in relation to longstanding distress and Alzheimer's disease

mental illness (multiadjusted HR 1.14, 95% CI 1.01-1.28). Finally, there were no associations between number of psychosocial stressors and VaD in any of the models.

## Discussion

We found that number of common psychosocial stressors in midlife was associated with incidence of late-life dementia, especially AD, in a population-based sample of women followed for 38 years. The associations remained when controlling for longstanding distress. We also found that number of psychosocial stressors in 1968 was related to increased level of distress at every examination conducted between 1968 and 2005.

We have previously reported that longstanding distress in midlife increase risk of AD<sup>11</sup> and structural brain changes.<sup>12</sup> These findings are now extended by showing that number of psychosocial stressors and report of distress independently predicted AD, i.e. increased distress could not completely explain the association between midlife stressors and dementia. One reason for this is that individuals respond differently to psychosocial stressors. Thus, biological responses may develop in connection with psychosocial stressors also in individuals who do not experience or report increased distress in association to the stressor.

There may be several biological explanations for the association between psychosocial stressors in midlife and dementia. One is related to the stress hypothesis. Stress may cause a number of physiological reactions in the central nervous, endocrine, immune and cardiovascular systems.<sup>10</sup> Thus, psychological stress has been reported to increase the activity of the hypothalamic-pituitary-adrenal axis and the levels of glucocorticoid hormones,<sup>22</sup> cause structural and functional damage to the hippocampus,<sup>22</sup> influence learning and memory processes,<sup>23</sup> increase the production of pro-inflammatory cytokines in the brain,<sup>10</sup> increase the

Common stressors in relation to longstanding distress and Alzheimer's disease

deposition of  $\beta$ -amyloid peptid and tau-protein in the brain<sup>24-26</sup> and to increase the frequency of cardiovascular disease<sup>27 28</sup>, and hypertension.<sup>29</sup> All these factors have been linked to dementia.<sup>30</sup>

The associations between psychosocial stressors reported in midlife and perceived distress later in life was consistent through all follow-up years, as indicated by ORs of similar magnitude. Thus, even common psychosocial stressors (related to work and family) can cause distress over several decades. Our finding is supported by studies reporting that stress-hormones may remain elevated many years after traumatic events.<sup>8</sup> Another explanation is that experiences of psychosocial traumas might make an individual more vulnerable to future stressors due to biological changes and dysfunctional stress coping mechanisms.<sup>31 32</sup>

### **Strengths and weaknesses of the study**

The strengths of this study include midlife report of psychosocial stressors occurring long before dementia onset, the long follow-up period, the representative population and that multiple sources of information were used to detect and diagnose dementia. Some methodological issues need to be considered. First, the rating of stressors was related to the last year for some stressors and at any time before 1968 for other stressors. However, both these were related to the outcome in a similar way (data not shown). Second, some stressors were of a short duration, while others were chronic and lasting for many years. In addition, some stressors were severe and others more trivial. This might give an unbalanced weight among the factors studied. Third, we only have information on a limited number of psychosocial stressors in our population. Some events were not included, e.g. physical abuse and own severe physical illness. The relationships might thus have been confounded by unmeasured factors. However, it is not likely that this had any major influence on our

Common stressors in relation to longstanding distress and Alzheimer's disease

1  
2  
3 findings. Fourth, individuals have different capacities to cope with stress and thus react  
4  
5 differently when exposed to the same stressor. We did not have an individual weighting of the  
6  
7 included stressors. If anything, this might have decreased the strengths of associations. Fifth,  
8  
9 some stressors are interrelated, for example mental illness and alcohol abuse in spouse.  
10  
11 However these stressors independently increased stress reactions (data not shown). We  
12  
13 therefore decided not to merge them. Sixth, cumulative attrition is a problem in long-term  
14  
15 follow-up studies. While this problem was, to some extent, alleviated by using medical  
16  
17 records and the hospital registry data to diagnose dementia in those lost to follow-up, these  
18  
19 sources probably underestimate the number of dementia cases. It should be noted, however,  
20  
21 that almost all people in Sweden received their hospital treatment within the public health  
22  
23 care system during the time of the study and that the Swedish Hospital Discharge Register  
24  
25 covers the entire country. Furthermore, the number of demented women detected in the  
26  
27 different age groups is what could be expected from other incidence studies.<sup>33</sup> Finally, it is  
28  
29 difficult to diagnose dementia subtypes on clinical grounds alone. Individuals with AD often  
30  
31 have cerebrovascular disease and individuals with VaD often have concomitant AD  
32  
33 pathology. Furthermore, cerebrovascular disease may influence the presence and severity of  
34  
35 clinical symptoms of AD, and vice versa.<sup>34</sup> It is thus often difficult to make a clear distinction  
36  
37 between AD and VaD in patients with a history of stroke or cerebrovascular disease, both on  
38  
39 clinical grounds and at autopsy, and mixed types are probably common.  
40  
41  
42  
43  
44  
45  
46

## 47 **Conclusion**

48  
49 To conclude, psychosocial stressors in midlife were associated with incidence of AD and  
50  
51 longstanding distress, over several decades. This suggests that common psychosocial stressors  
52  
53 may have severe and longstanding physiological and psychological consequences. It needs to  
54  
55 be elucidated whether more intensive interventions such as stress management and behavioral  
56  
57  
58  
59  
60

1 Common stressors in relation to longstanding distress and Alzheimer's disease

2  
3 therapy should be initiated in individuals who have experienced several negative psychosocial  
4  
5 stressors.  
6  
7

8  
9  
10 **Acknowledgement** The authors thank all members of the Prospective Population Study of  
11  
12 Women in Gothenburg study groups for their cooperation in data collection and management  
13  
14 and Valter Sundh for statistical assistance.  
15

16  
17  
18 **A funding statement** This work was supported by grant from the Swedish Medical Research  
19  
20 Council (11267, 2003-4443, 2005-8460, 2006-2782, 825-2007-7462); the Swedish Council  
21  
22 for Working Life and Social Research (2001-2835, 2001-2646, 2003-0234, 2004-0150, 2006-  
23  
24 0020, 2004-0145, 2006-0596, 2008-1229, 2006-0596, 2008-1111, 2006-1506, EpiLife; 2010-  
25  
26 0870); the Alzheimer's Association Zenith Award (ZEN-01-3151); the National Institutes of  
27  
28 Health/National Institutes on Aging (5R03AG026098-02); the Alzheimer's Association  
29  
30 Stephanie B. Overstreet Scholars (IIRG-00-2159); The Bank of Sweden Tercentenary  
31  
32 Foundation, Swedish Brain Power; Stiftelsen Söderström-Königska Sjukhemmet; Stiftelsen  
33  
34 för Gamla Tjänarinnor; Handlanden Hjalmar Svenssons Forskningsfond; Stiftelsen Professor  
35  
36 Bror Gadelius' Minnesfond and the Sahlgrenska Academy, University of Gothenburg.  
37  
38  
39

40  
41  
42 **Role of the funding source** The sponsors of the study had no role in the study design, data  
43  
44 collection, data analysis, data interpretation, or writing of the report. The corresponding  
45  
46 author had full access to all the data in the study and had final responsibility for the decision  
47  
48 to submit for publication.  
49  
50

51  
52  
53 **Competing interests** All authors have completed the ICMJE uniform disclosure form at  
54  
55 [www.icmje.org/coi\\_disclosure.pdf](http://www.icmje.org/coi_disclosure.pdf) (available on request from the corresponding author) and  
56  
57  
58  
59  
60

Common stressors in relation to longstanding distress and Alzheimer's disease

1  
2  
3 declare: no support from any organisation for the submitted work; no financial relationships  
4  
5 with any organizations that might have an interest in the submitted work in the previous three  
6  
7 years; no other relationships or activities that could appear to have influenced the submitted  
8  
9 work.  
10

11  
12  
13  
14 **Contributors** All authors participating in the interpretation of data, writing and critically  
15  
16 reviewing the paper. LJ, XG and IS designing the study, generate the hypothesis, and wrote  
17  
18 the draft. LJ did the analyses. All authors had full access to the data. LJ is guarantor.  
19

20  
21  
22  
23 **Ethical approval** The Ethics Committee of Gothenburg University approved the study and  
24  
25 informed consent was obtained from all participants, in accordance with the provision of the  
26  
27 Helsinki Declaration.  
28

29  
30  
31  
32 **Data sharing** Technical appendix, statistical code, and dataset available from the  
33  
34 corresponding author at Dryad repository, who will provide a permanent, citable and open  
35  
36 access home for the dataset.  
37  
38  
39  
40  
41  
42  
43  
44  
45  
46  
47  
48  
49  
50  
51  
52  
53  
54  
55  
56  
57  
58  
59  
60



Common stressors in relation to longstanding distress and Alzheimer's disease

## References

1. Bremner JD, Randall P, Scott TM, et al. MRI-based measurement of hippocampal volume in patients with combat-related posttraumatic stress disorder. *Am J Psychiatry* 1995;152(7):973-81.
2. Sezgin U, Punamaki RL. Earthquake trauma and causal explanation associating with PTSD and other psychiatric disorders among South East Anatolian women. *J Affect Disord* 2012.
3. Yehuda R, Bierer LM, Schmeidler J, et al. Low cortisol and risk for PTSD in adult offspring of holocaust survivors. *Am J Psychiatry* 2000;157(8):1252-9.
4. Norton MC, Ostbye T, Smith KR, et al. Early parental death and late-life dementia risk: findings from the Cache County Study. *Age Ageing* 2009;38(3):340-3.
5. Norton MC, Smith KR, Ostbye TV, et al. Early parental death and remarriage of widowed parents as risk factors for Alzheimer disease: the Cache County study. *Am J Geriatr Psychiatry* 2011;19(9):814-24.
6. Persson G, Skoog I. A prospective population study of psychosocial risk factors for late onset dementia. *Int J Geriatr Psych* 1996;11(1):15-22.
7. Tsolaki M, Papaliagkas V, Kounti F, et al. Severely stressful events and dementia: a study of an elderly Greek demented population. *Psychiatry Res* 2010;176(1):51-4.
8. Yehuda R, Golier JA, Harvey PD, et al. Relationship between cortisol and age-related memory impairments in Holocaust survivors with PTSD. *Psychoneuroendocrinology* 2005;30(7):678-87.
9. Cacioppo JT, Bureson MH, Poehlmann KM, et al. Autonomic and neuroendocrine responses to mild psychological stressors: effects of chronic stress on older women. *Ann Behav Med* 2000;22(2):140-8.
10. Leonard BE. HPA and immune axes in stress: involvement of the serotonergic system. *Neuroimmunomodulation* 2006;13(5-6):268-76.
11. Johansson L, Guo X, Waern M, et al. Midlife psychological stress and risk of dementia: a 35-year longitudinal population study. *Brain* 2010;133(Pt 8):2217-24.
12. Johansson L, Skoog I, Gustafson DR, et al. Midlife psychological distress associated with late-life brain atrophy and white matter lesions: a 32-year population study of women. *Psychosom Med* 2012;74(2):120-5.
13. Bengtsson C, Blohme G, Hallberg L, et al. The study of women in Gothenburg 1968-1969--a population study. General design, purpose and sampling results. *Acta Med Scand* 1973;193(4):311-8.
14. Lissner L, Skoog I, Andersson K, et al. Participation bias in longitudinal studies: experience from the Population Study of Women in Gothenburg, Sweden. *Scand J Prim Health Care* 2003;21(4):242-7.
15. Skoog I, Nilsson L, Palmertz B, et al. A population-based study of dementia in 85-year-olds. *N Engl J Med* 1993;328(3):153-8.
16. Guo X, Waern M, Sjogren K, et al. Midlife respiratory function and Incidence of Alzheimer's disease: a 29-year longitudinal study in women. *Neurobiol Aging* 2007;28(3):343-50.
17. Criteria for the clinical diagnosis of Alzheimer's disease. Excerpts from the NINCDS-ADRDA Work Group report. *J Am Geriatr Soc* 1985;33(1):2-3.
18. Roman GC, Tatemichi TK, Erkinjuntti T, et al. Vascular dementia: diagnostic criteria for research studies. Report of the NINDS-AIREN International Workshop. *Neurology* 1993;43(2):250-60.
19. Carlsson G. *Socialgruppering. Social mobility and class structure.* , 1958.

## Common stressors in relation to longstanding distress and Alzheimer's disease

20. Rose GA. The diagnosis of ischaemic heart pain and intermittent claudication in field surveys. *Bull World Health Organ* 1962;27:645-58.
21. Rinder L, Roupe S, Steen B, et al. Seventy-year-old people in Gothenburg. A population study in an industrialized Swedish city. *Acta Med Scand* 1975;198(5):397-407.
22. Sapolsky RM. Why stress is bad for your brain. *Science* 1996;273(5276):749-50.
23. Csernansky JG, Dong H, Fagan AM, et al. Plasma cortisol and progression of dementia in subjects with Alzheimer-type dementia. *Am J Psychiatry* 2006;163(12):2164-9.
24. Dong H, Goico B, Martin M, et al. Modulation of hippocampal cell proliferation, memory, and amyloid plaque deposition in APPsw (Tg2576) mutant mice by isolation stress. *Neuroscience* 2004;127(3):601-9.
25. Kang JE, Cirrito JR, Dong H, et al. Acute stress increases interstitial fluid amyloid-beta via corticotropin-releasing factor and neuronal activity. *Proc Natl Acad Sci U S A* 2007;104(25):10673-8.
26. Green KN, Billings LM, Roozendaal B, et al. Glucocorticoids increase amyloid-beta and tau pathology in a mouse model of Alzheimer's disease. *J Neurosci* 2006;26(35):9047-56.
27. Pickering TG. Mental stress as a causal factor in the development of hypertension and cardiovascular disease. *Curr Hypertens Rep* 2001;3(3):249-54.
28. Folkow B, Hallback M, Weiss L. Cardiovascular responses to acute mental "stress" in spontaneously hypertensive rats. *Clin Sci Mol Med Suppl* 1973;45 Suppl 1:131s-3.
29. Sparrenberger F, Cicheler FT, Ascoli AM, et al. Does psychosocial stress cause hypertension? A systematic review of observational studies. *J Hum Hypertens* 2009;23(1):12-9.
30. Skoog I, Kalaria RN, Breteler MM. Vascular factors and Alzheimer disease. *Alzheimer Dis Assoc Disord* 1999;13 Suppl 3:S106-14.
31. McFarlane AC, Yehuda R, Clark CR. Biologic models of traumatic memories and post-traumatic stress disorder. The role of neural networks. *Psychiatr Clin North Am* 2002;25(2):253-70, v.
32. Westerlund H, Gustafsson PE, Theorell T, et al. Social adversity in adolescence increases the physiological vulnerability to job strain in adulthood: a prospective population-based study. *PLoS One* 2012;7(4):e35967.
33. Fratiglioni L, Launer LJ, Andersen K, et al. Incidence of dementia and major subtypes in Europe: A collaborative study of population-based cohorts. Neurologic Diseases in the Elderly Research Group. *Neurology* 2000;54(11 Suppl 5):S10-5.
34. Snowdon DA, Greiner LH, Mortimer JA, et al. Brain infarction and the clinical expression of Alzheimer disease. The Nun Study. *JAMA* 1997;277(10):813-7.

## Common stressors in relation to longstanding distress and Alzheimer's disease

**Tables****Table 1** Characteristics of the study sample in 1968 (N=800)

|                            | n    | %    |
|----------------------------|------|------|
| Birth year (age)           |      |      |
| 1914 (54 year)             | 89   | 11.1 |
| 1918 (50 year)             | 291  | 36.4 |
| 1922 (46 year)             | 309  | 38.6 |
| 1930 (38 year)             | 111  | 13.9 |
| Education                  |      |      |
| Compulsory                 | 600  | 75.0 |
| More than compulsory       | 200  | 25.0 |
| Socioeconomic status       |      |      |
| Upper middle               | 161  | 20.2 |
| Lower middle               | 267  | 33.4 |
| Skilled workers            | 209  | 26.1 |
| Unskilled workers          | 163  | 20.4 |
| Marital status             |      |      |
| Married                    | 638  | 79.8 |
| Co-habited (not married)   | 94   | 11.7 |
| Living alone (not married) | 68   | 8.5  |
| Work status                |      |      |
| Full-time work             | 270  | 33.8 |
| Part-time work             | 258  | 32.3 |
| No work outside home       | 272  | 34.0 |
| Hypertension               |      |      |
| Hypertension               | 138  | 17.4 |
| CHD                        |      |      |
| CHD                        | 67   | 8.4  |
| Diabetes mellitus          |      |      |
| Diabetes mellitus          | 86   | 10.8 |
| Stroke                     |      |      |
| Stroke                     | 68   | 8.5  |
| Smoking                    |      |      |
| Smoking                    | 320  | 40.0 |
| Wine consumption           |      |      |
| None                       | 390  | 48.8 |
| < once weekly              | 249  | 31.1 |
| ≥ once weekly              | 155  | 19.4 |
|                            | Mean | SD   |
| Waist-to-hip ratio         | 0.74 | 0.05 |

## Common stressors in relation to longstanding distress and Alzheimer's disease

**Table 2** Prevalence of psychosocial stressors in women in 1968 (N=800)

|                                    | N   | %    |
|------------------------------------|-----|------|
| Physical illness in spouse         | 62  | 7.8  |
| Mental illness in spouse           | 98  | 12.3 |
| Alcohol abuse in spouse            | 55  | 6.9  |
| Social problem in spouse           | 81  | 10.1 |
| Work related problems in spouse    | 32  | 4.0  |
| Serious problem in children        | 70  | 8.8  |
| Mental illness in child            | 139 | 17.4 |
| Mental illness in father           | 151 | 18.9 |
| Alcohol abuse in father            | 100 | 12.5 |
| Mental illness in mother           | 212 | 26.5 |
| Mental illness in sibling          | 255 | 31.9 |
| Alcohol abuse in sibling           | 79  | 9.9  |
| Divorced                           | 65  | 8.1  |
| Widowed                            | 34  | 4.3  |
| Limited social contacts            | 53  | 6.6  |
| Work related problems              | 19  | 2.4  |
| Received help from social security | 10  | 1.3  |
| Extramarital childbirth            | 84  | 10.5 |
| Number of psychosocial stressors   |     |      |
| 0 psychosocial stressor            | 149 | 18.6 |
| 1 psychosocial stressor            | 197 | 24.6 |
| 2 psychosocial stressors           | 184 | 23.0 |
| 3 psychosocial stressors           | 143 | 19.9 |
| 4 psychosocial stressors           | 69  | 8.6  |
| ≥5 psychosocial stressors          | 58  | 7.2  |

**Table 3** Number of psychosocial stressors in 1968 in relations to report of distress in 1968, 1974, 1980, 2000 and 2005

|                  | Cases, n (%) | OR (95% CI) <sup>a</sup> | OR (95% CI) <sup>b</sup> |
|------------------|--------------|--------------------------|--------------------------|
| Distress in 1968 | 148 (18.5)   | 1.46 (1.30-1.63)         | 1.48 (1.32-1.67)         |
| Distress in 1974 | 161 (20.1)   | 1.31 (1.18-1.46)         | 1.31 (1.17-1.46)         |
| Distress in 1980 | 88 (11.0)    | 1.26 (1.10-1.43)         | 1.27 (1.11-1.45)         |
| Distress in 2000 | 49 (6.1)     | 1.41 (1.17-1.72)         | 1.39 (1.14-1.70)         |
| Distress in 2005 | 39 (2.6)     | 1.37 (1.05-1.80)         | 1.35 (1.02-1.79)         |

Logistic regression analyses presented as ORs with 95% CIs. <sup>a</sup>Adjusted for age. <sup>b</sup>Adjusted for age, education, socioeconomic status, marital status, work status, hypertension, CHD, stroke, diabetes mellitus, waist-to-hip ratio, smoking and wine consumption in 1968.

**Table 4** Number of psychosocial stressors in 1968 in relation to incidence of dementia over 38 years

|                     | Cases, n (%) | HR (95% CI) <sup>a</sup> | HR (95% CI) <sup>b</sup> | HR (95% CI) <sup>c</sup> |
|---------------------|--------------|--------------------------|--------------------------|--------------------------|
| All-type dementia   | 153 (19.1)   | 1.15 (1.05-1.27)         | 1.15 (1.04-1.27)         | 1.13 (1.01-1.26)         |
| Vascular dementia   | 35 (4.4)     | 0.94 (0.75-1.19)         | 0.92 (0.72-1.18)         | 0.93 (0.71-1.22)         |
| Alzheimer's disease | 104 (13.0)   | 1.21 (1.08-1.36)         | 1.20 (1.07-1.35)         | 1.17 (1.02-1.33)         |

Cox regression analyses presented as HRs with 95% CIs. <sup>a</sup>Adjusted for age. <sup>b</sup>Adjusted for age, education, socioeconomic status, marital status, work status, hypertension, CHD, stroke, diabetes mellitus, waist-to-hip ratio, smoking, and wine consumption in 1968. <sup>c</sup>Adjusted for age, education, socioeconomic status, marital status, work status, hypertension, CHD, stroke, diabetes mellitus, waist-to-hip ratio, smoking and wine consumption in 1968, and longstanding distress (i.e. in 1968, 1974 and 1980).

1  
2  
3 The original protocol for the study  
4

5 **A funding statement** This work was supported by grant from the Swedish Medical Research  
6 Council (11267, 2003-4443, 2005-8460, 2006-2782, 825-2007-7462); the Swedish Council  
7 for Working Life and Social Research (2001-2835, 2001-2646, 2003-0234, 2004-0150, 2006-  
8 0020, 2004-0145, 2006-0596, 2008-1229, 2006-0596, 2008-1111, 2006-1506, EpiLife; 2010-  
9 0870); the Alzheimer's Association Zenith Award (ZEN-01-3151); the National Institutes of  
10 Health/National Institutes on Aging (5R03AG026098-02); the Alzheimer's Association  
11 Stephanie B. Overstreet Scholars (IIRG-00-2159); The Bank of Sweden Tercentenary  
12 Foundation, Swedish Brain Power; Stiftelsen Söderström-Königska Sjukhemmet; Stiftelsen  
13 för Gamla Tjänarinnor; Handlanden Hjalmar Svenssons Forskningsfond; Stiftelsen Professor  
14 Bror Gadelius' Minnesfond and the Sahlgrenska Academy, University of Gothenburg.  
15  
16  
17  
18  
19  
20  
21  
22  
23  
24  
25  
26  
27  
28  
29

30 **Role of the funding source** The sponsors of the study had no role in the study design, data  
31 collection, data analysis, data interpretation, or writing of the report. The corresponding  
32 author had full access to all the data in the study and had final responsibility for the decision  
33 to submit for publication.  
34  
35  
36  
37  
38  
39

40 **Competing interests** All authors have completed the ICMJE uniform disclosure form at  
41 [www.icmje.org/coi\\_disclosure.pdf](http://www.icmje.org/coi_disclosure.pdf) (available on request from the corresponding author) and  
42 declare: no support from any organisation for the submitted work; no financial relationships  
43 with any organizations that might have an interest in the submitted work in the previous three  
44 years; no other relationships or activities that could appear to have influenced the submitted  
45 work.  
46  
47  
48  
49  
50  
51  
52  
53  
54  
55  
56  
57  
58  
59  
60

**Contributors** All authors participating in the interpretation of data, writing and critically reviewing the paper. LJ, XG and IS designing the study, generate the hypothesis, and wrote the draft. LJ did the analyses. All authors had full access to the data. LJ is guarantor.

### STROBE checklist

| Section/Topic            | Item # | Recommendation                                                                                                                                                                 | Reported on page # |
|--------------------------|--------|--------------------------------------------------------------------------------------------------------------------------------------------------------------------------------|--------------------|
| Title and abstract       | 1      | (a) Indicate the study's design with a commonly used term in the title or the abstract                                                                                         | 1                  |
|                          |        | (b) Provide in the abstract an informative and balanced summary of what was done and what was found                                                                            | 3                  |
| <b>Introduction</b>      |        |                                                                                                                                                                                |                    |
| Background/rationale     | 2      | Explain the scientific background and rationale for the investigation being reported                                                                                           | 5                  |
| Objectives               | 3      | State specific objectives, including any prespecified hypotheses                                                                                                               | 5                  |
| <b>Methods</b>           |        |                                                                                                                                                                                |                    |
| Study design             | 4      | Present key elements of study design early in the paper                                                                                                                        | 6                  |
| Setting                  | 5      | Describe the setting, locations, and relevant dates, including periods of recruitment, exposure, follow-up, and data collection                                                | 6                  |
| Participants             | 6      | (a) Give the eligibility criteria, and the sources and methods of selection of participants. Describe methods of follow-up                                                     | 6                  |
|                          |        | (b) For matched studies, give matching criteria and number of exposed and unexposed                                                                                            | 6                  |
| Variables                | 7      | Clearly define all outcomes, exposures, predictors, potential confounders, and effect modifiers. Give diagnostic criteria, if applicable                                       | 7-8                |
| Data sources/measurement | 8*     | For each variable of interest, give sources of data and details of methods of assessment (measurement). Describe comparability of assessment methods if there is more than one | 7-8                |



|                        |     |                                                                                                                                                                                                   |      |
|------------------------|-----|---------------------------------------------------------------------------------------------------------------------------------------------------------------------------------------------------|------|
|                        |     | group                                                                                                                                                                                             |      |
| Bias                   | 9   | Describe any efforts to address potential sources of bias                                                                                                                                         | 9-10 |
| Study size             | 10  | Explain how the study size was arrived at                                                                                                                                                         | 6    |
| Quantitative variables | 11  | Explain how quantitative variables were handled in the analyses. If applicable, describe which groupings were chosen and why                                                                      | 9-10 |
| Statistical methods    | 12  | (a) Describe all statistical methods, including those used to control for confounding                                                                                                             | 9-10 |
|                        |     | (b) Describe any methods used to examine subgroups and interactions                                                                                                                               | 9-10 |
|                        |     | (c) Explain how missing data were addressed                                                                                                                                                       | 9-10 |
|                        |     | (d) If applicable, explain how loss to follow-up was addressed                                                                                                                                    | 9-10 |
|                        |     | (e) Describe any sensitivity analyses                                                                                                                                                             | 9-10 |
| <b>Results</b>         |     |                                                                                                                                                                                                   |      |
| Participants           | 13* | (a) Report numbers of individuals at each stage of study—eg numbers potentially eligible, examined for eligibility, confirmed eligible, included in the study, completing follow-up, and analysed | 6    |
|                        |     | (b) Give reasons for non-participation at each stage                                                                                                                                              |      |
|                        |     | (c) Consider use of a flow diagram                                                                                                                                                                |      |
| Descriptive data       | 14* | (a) Give characteristics of study participants (eg demographic, clinical, social) and information on exposures and potential confounders                                                          | 20   |
|                        |     | (b) Indicate number of participants with missing data for each variable of interest                                                                                                               | 20   |
|                        |     | (c) Summarise follow-up time (eg, average and total amount)                                                                                                                                       | 6    |
| Outcome data           | 15* | Report numbers of outcome events or summary measures over time                                                                                                                                    | 11   |
| Main results           | 16  | (a) Give unadjusted estimates and, if applicable, confounder-adjusted estimates and their precision (eg, 95% confidence                                                                           | 11   |

|                          |    |                                                                                                                                                                            |       |
|--------------------------|----|----------------------------------------------------------------------------------------------------------------------------------------------------------------------------|-------|
|                          |    | interval). Make clear which confounders were adjusted for and why they were included                                                                                       |       |
|                          |    | (b) Report category boundaries when continuous variables were categorized                                                                                                  |       |
|                          |    | (c) If relevant, consider translating estimates of relative risk into absolute risk for a meaningful time period                                                           |       |
| Other analyses           | 17 | Report other analyses done—eg analyses of subgroups and interactions, and sensitivity analyses                                                                             | 10    |
| <b>Discussion</b>        |    |                                                                                                                                                                            |       |
| Key results              | 18 | Summarise key results with reference to study objectives                                                                                                                   | 13    |
| <b>Limitations</b>       |    |                                                                                                                                                                            |       |
| Interpretation           | 20 | Give a cautious overall interpretation of results considering objectives, limitations, multiplicity of analyses, results from similar studies, and other relevant evidence | 13-14 |
| Generalisability         | 21 | Discuss the generalisability (external validity) of the study results                                                                                                      | 13-14 |
| <b>Other information</b> |    |                                                                                                                                                                            |       |
| Funding                  | 22 | Give the source of funding and the role of the funders for the present study and, if applicable, for the original study on which the present article is based              | 16    |

**Ethical approval** The Ethics Committee of Gothenburg University approved the study and informed consent was obtained from all participants, in accordance with the provision of the Helsinki Declaration.

**Data sharing** Technical appendix, statistical code, and dataset available from the corresponding author at Dryad repository, who will provide a permanent, citable and open access home for the dataset.



**Title: Common psychosocial stressors in middle-aged women related to longstanding distress and increased risk of Alzheimer's disease: a 38 year follow-up study**

|                                 |                                                                                                                                                                                                                                                                                                                                                                                                                                                                                                                                                                                                                                                                                                                                                                                                                                                                                                                                                                                                                   |
|---------------------------------|-------------------------------------------------------------------------------------------------------------------------------------------------------------------------------------------------------------------------------------------------------------------------------------------------------------------------------------------------------------------------------------------------------------------------------------------------------------------------------------------------------------------------------------------------------------------------------------------------------------------------------------------------------------------------------------------------------------------------------------------------------------------------------------------------------------------------------------------------------------------------------------------------------------------------------------------------------------------------------------------------------------------|
| Journal:                        | <i>BMJ Open</i>                                                                                                                                                                                                                                                                                                                                                                                                                                                                                                                                                                                                                                                                                                                                                                                                                                                                                                                                                                                                   |
| Manuscript ID:                  | bmjopen-2013-003142.R1                                                                                                                                                                                                                                                                                                                                                                                                                                                                                                                                                                                                                                                                                                                                                                                                                                                                                                                                                                                            |
| Article Type:                   | Research                                                                                                                                                                                                                                                                                                                                                                                                                                                                                                                                                                                                                                                                                                                                                                                                                                                                                                                                                                                                          |
| Date Submitted by the Author:   | 05-Jul-2013                                                                                                                                                                                                                                                                                                                                                                                                                                                                                                                                                                                                                                                                                                                                                                                                                                                                                                                                                                                                       |
| Complete List of Authors:       | Johansson, Lena; Institute of Neuroscience and Physiology, Sahlgrenska Academy at G <sup>o</sup> teborg University, G <sup>o</sup> teborg, Swed<br>Guo, Xinxin; Institute of Neuroscience and Physiology, Sahlgrenska Academy at G <sup>o</sup> teborg University, G <sup>o</sup> teborg, Swed<br>Hällström, Tore; Neuroscience and Physiology, Psychiatry<br>Norton, Maria; Utah University, Department of Family Consumer and Human Development and Departments of Psychology<br>Waern, Margda; Institute of Neuroscience and Physiology, Sahlgrenska Academy at G <sup>o</sup> teborg University, G <sup>o</sup> teborg, Swed<br>Östling, Svante; Institute of Neuroscience and Physiology, Sahlgrenska Academy at G <sup>o</sup> teborg University, G <sup>o</sup> teborg, Swed<br>Skoog, Ingmar; Institute of Neuroscience and Physiology, Sahlgrenska Academy at G <sup>o</sup> teborg University, G <sup>o</sup> teborg, Swed<br>Bengtsson, Calle; , the Sahlgrenska Academy at University of Gothenburg,, |
| <b>Primary Subject Heading</b>: | Epidemiology                                                                                                                                                                                                                                                                                                                                                                                                                                                                                                                                                                                                                                                                                                                                                                                                                                                                                                                                                                                                      |
| Secondary Subject Heading:      | Neurology, Pathology, Mental health                                                                                                                                                                                                                                                                                                                                                                                                                                                                                                                                                                                                                                                                                                                                                                                                                                                                                                                                                                               |
| Keywords:                       | Old age psychiatry < PSYCHIATRY, EPIDEMIOLOGY, Dementia < NEUROLOGY, Neuropathology < NEUROLOGY                                                                                                                                                                                                                                                                                                                                                                                                                                                                                                                                                                                                                                                                                                                                                                                                                                                                                                                   |
|                                 |                                                                                                                                                                                                                                                                                                                                                                                                                                                                                                                                                                                                                                                                                                                                                                                                                                                                                                                                                                                                                   |

SCHOLARONE™  
Manuscripts

Common stressors in relation to longstanding distress and Alzheimer's disease

**Title page**

Title: Common psychosocial stressors in middle-aged women related to longstanding distress and increased risk of Alzheimer's disease: a 38 year longitudinal population study

Authors' names: Lena Johansson, Xinxin Guo, Tore Hällström, Maria C Norton, Margda Waern, Svante Östling, Calle Bengtsson, Ingmar Skoog

**Address for each author:** Neuropsychiatric Epidemiology Unit, Institute of Neuroscience and Physiology, Sahlgrenska Academy at Gothenburg University, Wallinsgatan 6, S-431 41 Mölndal, Sweden Lena Johansson researchers Xinxin Guo researcher, Tore Hällström professor emeritus, Margda Waern professor, Svante Östling associate professor, Ingmar Skoog professor Department of Clinical Neuroscience, Section for Psychiatry/Huddinge, Karolinska Institutet, Stockholm, Sweden Tore Hällström professor emeritus Department of Family Consumer and Human Development and Departments of Psychology, Utah State University, Logan, USA Maria Norton associate professor Sahlgrenska School of Public Health and Community Medicine, Section for Public Health Epidemiology, the Sahlgrenska Academy at University of Gothenburg, Gothenburg, Sweden Calle Bengtsson professor emeritus

**Correspondence to:** [lena.johansson@neuro.gu.se](mailto:lena.johansson@neuro.gu.se)

Common stressors in relation to longstanding distress and Alzheimer's disease

## Abstract

**Objective** To study the relation between psychosocial stressors, longstanding distress and incidence of dementia, in a sample of women followed from midlife to late-life.

**Design** Prospective longitudinal population study.

**Setting and Participants** The study is part of the Prospective Population Study of Women in Gothenburg, Sweden, which started in 1968 with subsequent follow-ups in 1974, 1980, 1992, 2000 and 2005. At baseline, 800 women aged 38-54 years (born in 1914, 1918, 1922 and 1930), rated 18 psychosocial stressors (e.g. divorce, widowhood, work problems and illness in relative).

**Primary and secondary outcome measures:** Symptoms of distress were measured according to a standardised question at each study wave. Dementia was diagnosed according to DSM-III-R and Alzheimer's disease (AD) according to NINCD-ADRDA.

**Results** During the 37-years follow-up 153 women developed dementia (104 of those had AD). Number of psychosocial stressors in 1968 was associated (HR, 95% CI) with higher incidence of dementia (1.15, 1.04-1.27) and AD (1.20, 1.07-1.35) between 1968 and 2005, in multivariate Cox regressions. Number of psychosocial stressors in 1968 was also associated (OR, 95% CI) with distress in 1968 (1.48, 1.32-1.67), 1974 (1.31, 1.17-1.46), 1980 (1.27, 1.11-1.45), 2000 (1.39, 1.14-1.70) and 2005 (1.35, 1.02-1.79), in multivariate logistic regressions. Number of psychosocial stressors (HR 1.17, 95% CI 1.03-1.33) and longstanding distress (1968-1974-1980) (HR 1.58, 95% CI 1.03-2.45) were independently associated with AD.

**Conclusions** Our study shows that common psychosocial stressors may have severe and longstanding physiological and psychological consequences. However, more studies are needed to confirm these results and investigate whether more interventions such as stress

Common stressors in relation to longstanding distress and Alzheimer’s disease

management and behavioral therapy should be initiated in individuals who have experienced psychosocial stressors.

1  
2  
3  
4  
5  
6  
7  
8  
9  
10  
11  
12  
13  
14  
15  
16  
17  
18  
19  
20  
21  
22  
23  
24  
25  
26  
27  
28  
29  
30  
31  
32  
33  
34  
35  
36  
37  
38  
39  
40  
41  
42  
43  
44  
45  
46  
47  
48  
49  
50  
51  
52  
53  
54  
55  
56  
57  
58  
59  
60

For peer review only

Common stressors in relation to longstanding distress and Alzheimer's disease

### Article summary

#### Article focus

To study the relation between psychosocial stressors, longstanding distress and incidence of dementia, in a sample of women followed over 38 years, from mid- to late-life.

#### Key messages

The study shows that the number of psychosocial stressors, measured in middle-aged women, was related to distress and incidence of AD almost four decades later.

The study also shows that the association between number of psychosocial stressors and AD was independent of longstanding perceived distress.

#### Strengths and limitations of this study

The strengths of this study include midlife report of psychosocial stressors occurring long before dementia onset, the long follow-up period, the representative population and that multiple sources of information were used to detect and diagnose dementia.

The rating of stressors was related to the last year for some stressors and at any time before 1968 for other stressors. Some stressors were of a short duration, while others were chronic and lasting for many years. We only have information on a limited number of psychosocial stressors in our population. Individuals have different capacities to cope with stress and thus react differently when exposed to the same stressor. We did not have an individual weighting of the included stressors.

Common stressors in relation to longstanding distress and Alzheimer's disease

## Introduction

Experiences of severe psychological stressors in adulthood (e.g. combat<sup>1</sup>, natural disasters<sup>2</sup> and the Holocaust<sup>3</sup>) are known to influence mental and physical health decades later. More mild psychosocial stressors are common and could be regarded as part of normal life. The long-term consequences of these more common stressors remain unclear. Epidemiological studies in the elderly with follow-ups of less than 10 years have reported that history of early parental death,<sup>4-6</sup> death of spouse<sup>7</sup> and psychosocial risk factors in childhood<sup>6</sup> increase the risk of dementia or Alzheimer's disease (AD). One explanation for the associations may be that traumatic experiences give rise to longstanding chronic distress many years after the trauma. This may lead to a cumulative burden to the brain with dysregulation in neuroendocrine systems.<sup>8-10</sup> A study among Holocaust survivors found that higher levels of stress hormones remained decades after the traumatic experiences.<sup>8</sup>

We have previously reported that longstanding distress in midlife leads to long-term consequences decades later, such as increased risk of dementia, AD<sup>11</sup> and structural brain changes<sup>12</sup>. To our knowledge, no population study has examined if number of psychosocial stressors in midlife increase the risk of dementia in late-life, and whether this is modified by longstanding distress.

The aim of this study was to examine whether common psychosocial stressors in midlife were related to distress, late-life dementia and AD, in women followed over 38 years. We further aimed to examine whether experiences of psychosocial stressors modify the previously reported association between longstanding midlife distress and AD.



Common stressors in relation to longstanding distress and Alzheimer's disease

## Methods

### Study population

This study is part of the Prospective Population Study of Women in Gothenburg, Sweden<sup>13 14</sup> which was initiated in 1968 with an examination of 1462 women (participation rate 90%) born in 1908, 1914, 1918, 1922 and 1930. The individuals were systematically sampled from the Swedish Population Registry based on specific birth dates in order to yield a representative sample at the ages studied. Follow-ups were performed in 1974, 1980, 1992, 2000 and 2005 with participation rates among survivors of 91%, 83%, 70%, 71% and 70% respectively. The Ethics Committee of Gothenburg University approved the study and informed consent was obtained from all participants, in accordance with the provision of the Helsinki Declaration.

The present study included a subsample of 800 women who were systematically selected for a psychiatric examination in 1968. The women were aged 38 years (n=111), 46 years (n=309), 50 years (n=290) and 54 years (n=90). Among them, 713 participated in the follow-up examination in 1974, 639 in 1980, 472 in 1992, 368 in 2000 and 296 in 2005. Losses were mainly due to death.

### Assessment of psychosocial stressors

At baseline 1968, eighteen predefined psychosocial stressors were asked and rated by a psychiatrist during the psychiatric examination. These included: divorce, widowhood, serious problem in children (e.g. physical illness, death and abuse), extramarital childbirth, mental illness in spouse or first degree relative, alcohol abuse in spouse or first degree relative, physical illness or social problems related to husband, receiving help from social-security, problem related to husband's or own work (e.g. lost work) and limited social network. Some

Common stressors in relation to longstanding distress and Alzheimer's disease

of the stressors (physical illness, mental illness and alcohol abuse in spouse; serious problem and mental illness in child; work related problems and limited social network) were rated in the last year before examination in 1968. The others were rated as occurring at any time prior to the examination in 1968.

### **Assessment of distress**

Symptoms of distress were rated according to a standardized question in 1968, 1974, 1980, 2000 and 2005. The question was worded identically at each examination; "Have you experienced any period of distress (one month or longer) in relation to circumstances in everyday life, such as work, health or family situation? Distress refers to feelings of irritability, tension, nervousness, fear, anxiety or sleep disturbances." Participants were asked to choose between; 0=Have never experienced any period of distress; 1=Have experienced period/s of distress more than five years ago; 2=Have experienced one period of distress during the last five years; 3=Have experienced several periods of distress during the last five years; 4=Have experienced constant distress during the last year; or 5=Have experienced constant distress during the last five years. In the present study, distress is defined as a rating of 3 to 5.

### **Psychiatric examinations**

The psychiatric examinations were performed in 1968, 1974, 1980 and 1992 by psychiatrists and in 2000 and 2005 by experienced psychiatric research nurses. The examinations were semi-structured and included a comprehensive neuropsychiatric examination and an extensive battery of neuropsychiatric tests.<sup>15</sup> Close informant interviews were performed in 1992, 2000 and 2005. These included questions about changes in behaviour and intellectual functions and, in cases of dementia, age of onset and disease course.<sup>15</sup> Medical records were collected

1 Common stressors in relation to longstanding distress and Alzheimer's disease  
2  
3 from all inpatient and outpatient departments and general practitioners' offices in Gothenburg.  
4  
5 The Swedish Hospital Discharge Registry provided diagnostic information for all individuals  
6  
7 discharged from hospitals on a nationwide basis since 1978.  
8  
9

### 10 11 **Diagnosis of dementia**

12  
13 The diagnosis of dementia was based on information from psychiatric examinations, close  
14  
15 informant interviews, medical record examinations and the Swedish Hospital Discharge  
16  
17 Registry. The diagnostic procedures have been described in detail previously.<sup>15</sup> Dementia  
18  
19 diagnosis at each examination was made according to the Diagnostic and Statistical Manual of  
20  
21 Mental Disorders (DSM-III-R) based on the combined information from the psychiatric  
22  
23 examination and the close informant interview. Dementia diagnoses for individuals lost to  
24  
25 follow-up were based on information from medical records evaluated by geriatric  
26  
27 psychiatrists in consensus conferences, and information from the Swedish Hospital Discharge  
28  
29 Registry.<sup>16</sup>  
30  
31  
32  
33  
34  
35

36 AD was diagnosed according to the criteria of the National Institute of Neurological and  
37  
38 Communicative Disorders and Stroke and the Alzheimer's Disease and Related Disorders  
39  
40 Association (NINCDS-ADRDA).<sup>17</sup> The criteria for vascular dementia (VaD) were similar to  
41  
42 the criteria proposed by the National Institute of Neurological Disorders and Stroke and the  
43  
44 Association Internationale pour la Recherche et l'Enseignement en Neurosciences (NINDS-  
45  
46 AIREN).<sup>18</sup> VaD was thus diagnosed when there was a temporal relationship (within 1 year)  
47  
48 between a history of acute focal neurological symptoms and signs (hemiparesis or motor  
49  
50 aphasia) and the first symptoms of dementia. Other dementias were diagnosed when other  
51  
52 causes were likely to have caused the dementia. Person-years were calculated from the date of  
53  
54 the baseline examination to (a) the time of dementia onset; (b) the date of death; (c) the date  
55  
56  
57  
58  
59  
60

Common stressors in relation to longstanding distress and Alzheimer's disease

of the last follow-up examination for participants in 2005; or (d) December 31, 2006 for surviving drop-outs.

### **Potential confounders and mediators**

Information on education, socioeconomic status, marital status and work status was obtained at the examination in 1968, and information on blood pressure, antihypertensive medication use, coronary heart disease (CHD), diabetes mellitus, stroke, waist and hip circumferences, cigarette smoking and wine consumption was obtained at the examinations in 1968, 1974 and 1980. Education was dichotomised as compulsory (6 years for those born 1914-1922 and 7 years for those born 1930) versus more than compulsory education. Socioeconomic status was based on husband's occupation for married women, and own occupation for unmarried women and was defined as higher middle, lower middle, skilled workers and unskilled workers.<sup>19</sup> Marital status was classified as married and/or co-habiting versus single. Work status was measured as full-time work and/or part-time work versus no work outside home. Hypertension was defined as systolic blood pressure of 160 mmHg or more, and/or diastolic blood pressure 95 mmHg or more and/or taking antihypertensive medication. CHD was defined as angina pectoris according to the Rose criteria<sup>20</sup> or documented history of myocardial infarction. Diabetes mellitus was defined as a diagnosis told by a doctor, death certificates, being on anti-diabetes drugs or having two fasting blood glucose values of 7.0 mmol/l or more. Stroke was diagnosed based on information from the examinations and the Swedish Hospital Discharge Registry. High waist-to-hip ratio was defined as a ratio of waist and hip circumferences over 0.85. Cigarette smoking was defined as never, former or current smoker. Wine consumption was classified as none, less than once weekly and once weekly or more.

Common stressors in relation to longstanding distress and Alzheimer's disease

### Statistical analyses

Logistic regressions were used to analyse the associations between number of psychosocial stressors in 1968 and report of distress in 1968, 1974, 1980, 2000 and 2005. The results are presented as odds ratios (ORs) and 95% confidence intervals (CIs) in three separate models. The 1<sup>st</sup> model adjusts for age only. The 2<sup>nd</sup> model adjusts for age, education, socioeconomic status, marital status, work status, hypertension, CHD, stroke, diabetes mellitus, waist-to-hip ratio, smoking and wine consumption. The 3<sup>rd</sup> model adjusts for age and psychiatric family history, i.e. mental illness in mother, father and/or sibling. (These three variables were then not counted as psychosocial stressors).

Cox regressions were used to study the associations between number of psychosocial stressors and incidence of dementia and dementia subtypes. Associations are presented as hazard ratios (HRs) and 95% CIs, and model 1-3 adjust for the same covariates as listed above. The 4<sup>th</sup> model adjusts for age and longstanding midlife distress (i.e. distress in all examinations 1968-1974-1980). Two interaction models were also added; (1) number of stressors\*psychiatric family in relation to AD and (2) number of stressors\*longstanding distress in relation to AD. Finally, we examined the associations between longstanding midlife distress and psychosocial stressors in relation to AD before and after age 75.

### Results

Characteristics of the 800 participants are given in Table 1. The proportion of women who reported specific life stressors in 1968 are shown in Table 2. Twenty-five percent of the women reported one psychosocial stressor, 23% reported two stressors, 20% three stressors and 16% four or more stressors. The most frequently reported psychosocial stressor was mental illness in first degree relative (mother 27 %, father 19% and sibling 32%).

Common stressors in relation to longstanding distress and Alzheimer's disease

Four hundred and twenty five participants died during follow-up (mean age 79 years). From 1968 to 2006, 153 (19.1%) women developed dementia during 25,131 person-years of follow-up, including 104 with AD, 35 with VaD and 14 with other dementias. The mean time from the baseline examination in 1968 to dementia onset was 29 years (26 had dementia onset before 1992, 73 between 1992 and 2000 and 54 after 2000). Mean age of dementia onset was 78 years (45 had dementia onset before age 75 years and 108 after age 75 years).

Number of psychosocial stressors in 1968 was associated with distress in 1968, 1974, 1980, 2000 and 2005, after adjustment for potential confounders (Table 3). ORs were similar after further adjustment for psychiatric family history in model 3. Number of psychosocial stressors was associated with longstanding midlife distress (i.e. distress in 1968-1974-1980) both in later born cohorts, born 1922 and 1930, (multiadjusted OR 1.32, 95% CI 1.14-1.52) and earlier born cohorts, born 1914 and 1918 (multiadjusted OR 1.58, 95% CI 1.30-1.94).

Number of psychosocial stressors in 1968 was associated with higher incidence of AD (HR 1.21, 95% CI 1.08-1.36) and all-type dementia (HR 1.15, 95% CI 1.05-1.27) (Table 4). The associations remained after adjusting for multiple confounders in model 2, psychiatric family history in model 3 and longstanding distress (i.e. distress in 1968-1974-1980) in model 4. In the 4<sup>th</sup> model, longstanding distress (HR 1.58, 95% CI 1.01-2.46) and number of psychosocial stressors (HR 1.17, 95% CI 1.02-1.33) were independently associated with AD. There were no interactions between number of stressors and psychiatric family history in relation to AD (age adjusted HR 1.05, 95% CI 0.75-1.45, p=0.79) or between number of stressors and longstanding distress in relation to AD (age adjusted HR 1.04, 95% CI 0.77-1.40, p=0.82).

The association between number of psychosocial stressors and incidence of AD were similar

1  
2  
3  
4  
5  
6  
7  
8  
9  
10  
11  
12  
13  
14  
15  
16  
17  
18  
19  
20  
21  
22  
23  
24  
25  
26  
27  
28  
29  
30  
31  
32  
33  
34  
35  
36  
37  
38  
39  
40  
41  
42  
43  
44  
45  
46  
47  
48  
49  
50  
51  
52  
53  
54  
55  
56  
57  
58  
59  
60

Common stressors in relation to longstanding distress and Alzheimer's disease in those with early onset AD (aged <75 years) (multiadjusted HR 1.25, 95% CI 1.02-1.54) and late onset AD (aged  $\geq$ 75 years) (multiadjusted HR 1.19, 95% CI 1.03-1.38). There were no visible associations between number of psychosocial stressors and VaD in any of the models.

## Discussion

We found that number of common psychosocial stressors in midlife was associated with incidence of late-life dementia, especially AD, in a population-based sample of women followed for 38 years. The associations remained when controlling for longstanding distress. We also found that number of psychosocial stressors in 1968 was related to increased level of distress at every examination conducted between 1968 and 2005.

We have previously reported that longstanding distress in midlife increase risk of AD<sup>11</sup> and structural brain changes.<sup>12</sup> These findings are now extended by showing that number of psychosocial stressors and report of distress independently predicted AD, i.e. increased distress could not completely explain the association between midlife stressors and dementia. One reason for this is that individuals respond differently to psychosocial stressors. Thus, biological responses may develop in connection with psychosocial stressors also in individuals who do not experience or report increased distress in association to the stressor.

There may be several biological explanations for the association between psychosocial stressors in midlife and dementia. One is related to the stress hypothesis. Stress may cause a number of physiological reactions in the central nervous, endocrine, immune and cardiovascular systems.<sup>10 21</sup> Thus, psychological stress has been reported to increase the activity of the hypothalamic-pituitary-adrenal axis and the levels of glucocorticoid

Common stressors in relation to longstanding distress and Alzheimer's disease

hormones,<sup>22</sup> cause structural and functional damage to the hippocampus,<sup>22</sup> influence learning and memory processes,<sup>23</sup> increase the production of pro-inflammatory cytokines in the brain,<sup>10</sup> increase the deposition of  $\beta$ -amyloid peptid and tau-protein in the brain<sup>24-26</sup> and to increase the frequency of cardiovascular disease<sup>27,28</sup>, and hypertension.<sup>29</sup> All these factors have been linked to dementia.<sup>30</sup>

The associations between psychosocial stressors reported in midlife and perceived distress later in life was consistent through all follow-up years, as indicated by ORs of similar magnitude. Thus, even common psychosocial stressors (related to work and family) can cause distress over several decades. Our finding is supported by studies reporting that stress-hormones may remain elevated many years after traumatic events.<sup>8</sup> Another explanation is that experiences of psychosocial traumas might make an individual more vulnerable to future stressors due to biological changes and dysfunctional stress coping mechanisms.<sup>31,32</sup>

### **Strengths and weaknesses of the study**

The strengths of this study include midlife report of psychosocial stressors occurring long before dementia onset, the long follow-up period, the representative population and that multiple sources of information were used to detect and diagnose dementia. Some methodological issues need to be considered. First, the rating of stressors was related to the last year for some stressors and at any time before 1968 for other stressors. However, both these were related to the outcome in a similar way (data not shown). Second, some stressors were of a short duration, while others were chronic and lasting for many years. In addition, some stressors were severe and others more trivial. This might give an unbalanced weight among the factors studied. Third, we only have information on a limited number of psychosocial stressors in our population. Some events were not included, e.g. physical abuse



1  
2  
3  
4  
5  
6  
7  
8  
9  
10  
11  
12  
13  
14  
15  
16  
17  
18  
19  
20  
21  
22  
23  
24  
25  
26  
27  
28  
29  
30  
31  
32  
33  
34  
35  
36  
37  
38  
39  
40  
41  
42  
43  
44  
45  
46  
47  
48  
49  
50  
51  
52  
53  
54  
55  
56  
57  
58  
59  
60

Common stressors in relation to longstanding distress and Alzheimer's disease and own severe physical illness. The relationships might thus have been confounded by unmeasured factors. However, it is not likely that this had any major influence on our findings. Fourth, individuals have different capacities to cope with stress and thus react differently when exposed to the same stressor. We did not have an individual weighting of the included stressors. If anything, this might have decreased the strengths of associations. Fifth, some stressors are interrelated, for example mental illness and alcohol abuse in spouse. However these stressors independently increased stress reactions (data not shown). We therefore decided not to merge them. Sixth, distress in our study was based on self-report and we did not include an objective measure of stress reactions. However, most epidemiological studies use subjective report to assess stress or distress. Seventh, there are a number of risk factors occurring between baseline and development of dementia and these might potentially modify the association between common psychosocial stressors in midlife and dementia. However, these risk factors would most likely decrease the possibility to find associations in a study with long follow-up, as may exert competing risk, and controlling for future factors might lead to an over-adjustment. Eighth, psychiatric family history may have an impact on the predisposition to distress and dementia. However, after adjust for psychiatric family history (i.e. mental illness in mother, father and/or sibling) the associations between number of stressors was still associated with both longstanding distress, AD and all-type dementia. Ninth, cumulative attrition is a problem in long-term follow-up studies. While this problem was, to some extent, alleviated by using medical records and the hospital registry data to diagnose dementia in those lost to follow-up, these sources probably underestimate the number of dementia cases. It should be noted, however, that almost all people in Sweden received their hospital treatment within the public health care system during the time of the study and that the Swedish Hospital Discharge Register covers the entire country. Furthermore, the number of demented women detected in the different age groups is what

Common stressors in relation to longstanding distress and Alzheimer's disease

could be expected from other incidence studies.<sup>33</sup> Finally, it is difficult to diagnose dementia subtypes on clinical grounds alone. Individuals with AD often have cerebrovascular disease and individuals with VaD often have concomitant AD pathology. Furthermore, cerebrovascular disease may influence the presence and severity of clinical symptoms of AD, and vice versa.<sup>34</sup> It is thus often difficult to make a clear distinction between AD and VaD in patients with a history of stroke or cerebrovascular disease, both on clinical grounds and at autopsy, and mixed types are probably common.

### **Conclusion**

To conclude, psychosocial stressors in midlife were associated with incidence of AD and longstanding distress, over several decades. This suggests that common psychosocial stressors may have severe and longstanding physiological and psychological consequences. However, more studies are needed to confirm these results and investigate whether more interventions such as stress management and behavioral therapy should be initiated in individuals who have experienced psychosocial stressors.

### **Acknowledgement**

The authors thank all members of the Prospective Population Study of Women in Gothenburg study groups for their cooperation in data collection and management and Valter Sundh for statistical assistance.

Common stressors in relation to longstanding distress and Alzheimer's disease

## References

1. Bremner JD, Randall P, Scott TM, Bronen RA, Seibyl JP, Southwick SM, et al. MRI-based measurement of hippocampal volume in patients with combat-related posttraumatic stress disorder. *Am J Psychiatry* 1995;152(7):973-81.
2. Sezgin U, Punamaki RL. Earthquake trauma and causal explanation associating with PTSD and other psychiatric disorders among South East Anatolian women. *J Affect Disord* 2012.
3. Yehuda R, Bierer LM, Schmeidler J, Aferiat DH, Breslau I, Dolan S. Low cortisol and risk for PTSD in adult offspring of holocaust survivors. *Am J Psychiatry* 2000;157(8):1252-9.
4. Norton MC, Ostbye T, Smith KR, Munger RG, Tschanz JT. Early parental death and late-life dementia risk: findings from the Cache County Study. *Age Ageing* 2009;38(3):340-3.
5. Norton MC, Smith KR, Ostbye T, Tschanz JT, Schwartz S, Corcoran C, et al. Early parental death and remarriage of widowed parents as risk factors for Alzheimer disease: the Cache County study. *Am J Geriatr Psychiatry* 2011;19(9):814-24.
6. Persson G, Skoog I. A prospective population study of psychosocial risk factors for late onset dementia. *Int J Geriatr Psych* 1996;11(1):15-22.
7. Tsolaki M, Papaliagkas V, Kounti F, Messini C, Boziki M, Anogianakis G, et al. Severely stressful events and dementia: a study of an elderly Greek demented population. *Psychiatry Res* 2010;176(1):51-4.
8. Yehuda R, Golier JA, Harvey PD, Stavitsky K, Kaufman S, Grossman RA, et al. Relationship between cortisol and age-related memory impairments in Holocaust survivors with PTSD. *Psychoneuroendocrinology* 2005;30(7):678-87.
9. Cacioppo JT, Burleson MH, Poehlmann KM, Malarkey WB, Kiecolt-Glaser JK, Berntson GG, et al. Autonomic and neuroendocrine responses to mild psychological stressors: effects of chronic stress on older women. *Ann Behav Med* 2000;22(2):140-8.
10. Leonard BE. HPA and immune axes in stress: involvement of the serotonergic system. *Neuroimmunomodulation* 2006;13(5-6):268-76.
11. Johansson L, Guo X, Waern M, Ostling S, Gustafson D, Bengtsson C, et al. Midlife psychological stress and risk of dementia: a 35-year longitudinal population study. *Brain* 2010;133(Pt 8):2217-24.
12. Johansson L, Skoog I, Gustafson DR, Olesen PJ, Waern M, Bengtsson C, et al. Midlife psychological distress associated with late-life brain atrophy and white matter lesions: a 32-year population study of women. *Psychosom Med* 2012;74(2):120-5.
13. Bengtsson C, Blohme G, Hallberg L, Hallstrom T, Isaksson B, Korsan-Bengtson K, et al. The study of women in Gothenburg 1968-1969--a population study. General design, purpose and sampling results. *Acta Med Scand* 1973;193(4):311-8.
14. Lissner L, Skoog I, Andersson K, Beckman N, Sundh V, Waern M, et al. Participation bias in longitudinal studies: experience from the Population Study of Women in Gothenburg, Sweden. *Scand J Prim Health Care* 2003;21(4):242-7.
15. Skoog I, Nilsson L, Palmertz B, Andreasson LA, Svanborg A. A population-based study of dementia in 85-year-olds. *N Engl J Med* 1993;328(3):153-8.
16. Guo X, Waern M, Sjogren K, Lissner L, Bengtsson C, Bjorkelund C, et al. Midlife respiratory function and Incidence of Alzheimer's disease: a 29-year longitudinal study in women. *Neurobiol Aging* 2007;28(3):343-50.
17. Criteria for the clinical diagnosis of Alzheimer's disease. Excerpts from the NINCDS-ADRDA Work Group report. *J Am Geriatr Soc* 1985;33(1):2-3.

## Common stressors in relation to longstanding distress and Alzheimer's disease

18. Roman GC, Tatemichi TK, Erkinjuntti T, Cummings JL, Masdeu JC, Garcia JH, et al. Vascular dementia: diagnostic criteria for research studies. Report of the NINDS-AIREN International Workshop. *Neurology* 1993;43(2):250-60.
19. Carlsson G. *Socialgruppering. Social mobility and class structure.* , 1958.
20. Rose GA. The diagnosis of ischaemic heart pain and intermittent claudication in field surveys. *Bull World Health Organ* 1962;27:645-58.
21. Buckley T, Sunari D, Marshall A, Bartrop R, McKinley S, Tofler G. Physiological correlates of bereavement and the impact of bereavement interventions. *Dialogues Clin Neurosci* 2012;14(2):129-39.
22. Sapolsky RM. Why stress is bad for your brain. *Science* 1996;273(5276):749-50.
23. Csernansky JG, Dong H, Fagan AM, Wang L, Xiong C, Holtzman DM, et al. Plasma cortisol and progression of dementia in subjects with Alzheimer-type dementia. *Am J Psychiatry* 2006;163(12):2164-9.
24. Dong H, Goico B, Martin M, Csernansky CA, Bertchume A, Csernansky JG. Modulation of hippocampal cell proliferation, memory, and amyloid plaque deposition in APPsw (Tg2576) mutant mice by isolation stress. *Neuroscience* 2004;127(3):601-9.
25. Kang JE, Cirrito JR, Dong H, Csernansky JG, Holtzman DM. Acute stress increases interstitial fluid amyloid-beta via corticotropin-releasing factor and neuronal activity. *Proc Natl Acad Sci U S A* 2007;104(25):10673-8.
26. Green KN, Billings LM, Roozendaal B, McGaugh JL, LaFerla FM. Glucocorticoids increase amyloid-beta and tau pathology in a mouse model of Alzheimer's disease. *J Neurosci* 2006;26(35):9047-56.
27. Pickering TG. Mental stress as a causal factor in the development of hypertension and cardiovascular disease. *Curr Hypertens Rep* 2001;3(3):249-54.
28. Folkow B, Hallback M, Weiss L. Cardiovascular responses to acute mental "stress" in spontaneously hypertensive rats. *Clin Sci Mol Med Suppl* 1973;45 Suppl 1:131s-3.
29. Sparrenberger F, Cicheler FT, Ascoli AM, Fonseca FP, Weiss G, Berwanger O, et al. Does psychosocial stress cause hypertension? A systematic review of observational studies. *J Hum Hypertens* 2009;23(1):12-9.
30. Skoog I, Kalaria RN, Breteler MM. Vascular factors and Alzheimer disease. *Alzheimer Dis Assoc Disord* 1999;13 Suppl 3:S106-14.
31. McFarlane AC, Yehuda R, Clark CR. Biologic models of traumatic memories and post-traumatic stress disorder. The role of neural networks. *Psychiatr Clin North Am* 2002;25(2):253-70, v.
32. Westerlund H, Gustafsson PE, Theorell T, Janlert U, Hammarstrom A. Social adversity in adolescence increases the physiological vulnerability to job strain in adulthood: a prospective population-based study. *PLoS One* 2012;7(4):e35967.
33. Fratiglioni L, Launer LJ, Andersen K, Breteler MM, Copeland JR, Dartigues JF, et al. Incidence of dementia and major subtypes in Europe: A collaborative study of population-based cohorts. Neurologic Diseases in the Elderly Research Group. *Neurology* 2000;54(11 Suppl 5):S10-5.
34. Snowdon DA, Greiner LH, Mortimer JA, Riley KP, Greiner PA, Markesbery WR. Brain infarction and the clinical expression of Alzheimer disease. The Nun Study. *JAMA* 1997;277(10):813-7.

## Common stressors in relation to longstanding distress and Alzheimer's disease

**Table 1** Characteristics of the study sample (N=800)

|                                      | N   | %    |
|--------------------------------------|-----|------|
| Birth year (age)                     |     |      |
| 1914 (54 year)                       | 89  | 11.1 |
| 1918 (50 year)                       | 291 | 36.4 |
| 1922 (46 year)                       | 309 | 38.6 |
| 1930 (38 year)                       | 111 | 13.9 |
| Education <sup>a</sup>               |     |      |
| Compulsory                           | 600 | 75.0 |
| More than compulsory                 | 200 | 25.0 |
| Socioeconomic status <sup>a</sup>    |     |      |
| Upper middle                         | 161 | 20.2 |
| Lower middle                         | 267 | 33.4 |
| Skilled workers                      | 209 | 26.1 |
| Unskilled workers                    | 163 | 20.4 |
| Marital status <sup>a</sup>          |     |      |
| Married                              | 638 | 79.8 |
| Co-habited (not married)             | 94  | 11.7 |
| Living alone (not married)           | 68  | 8.5  |
| Work status <sup>a</sup>             |     |      |
| Full-time work                       | 270 | 33.8 |
| Part-time work                       | 258 | 32.3 |
| No work outside home                 | 272 | 34.0 |
| Hypertension <sup>b</sup>            |     |      |
| Coronary heart disease <sup>b</sup>  | 74  | 9.3  |
| Diabetes mellitus <sup>b</sup>       | 24  | 3.0  |
| Stroke <sup>b</sup>                  | 5   | 0.5  |
| Smoking <sup>b</sup>                 | 341 | 42.6 |
| Wine consumption <sup>b</sup>        | 246 | 30.8 |
| High waist-to-hip ratio <sup>b</sup> | 210 | 26.3 |

<sup>a</sup>Measured in 1968, <sup>b</sup>Measured in 1968, 1974 and 1980

## Common stressors in relation to longstanding distress and Alzheimer's disease

**Table 2** Prevalence of psychosocial stressors in women in 1968 (N=800)

|                                    | N   | %    |
|------------------------------------|-----|------|
| Physical illness in spouse         | 62  | 7.8  |
| Mental illness in spouse           | 98  | 12.3 |
| Alcohol abuse in spouse            | 55  | 6.9  |
| Social problem in spouse           | 81  | 10.1 |
| Work related problems in spouse    | 32  | 4.0  |
| Serious problem in children        | 70  | 8.8  |
| Mental illness in child            | 139 | 17.4 |
| Mental illness in father           | 151 | 18.9 |
| Alcohol abuse in father            | 100 | 12.5 |
| Mental illness in mother           | 212 | 26.5 |
| Mental illness in sibling          | 255 | 31.9 |
| Alcohol abuse in sibling           | 79  | 9.9  |
| Divorced                           | 65  | 8.1  |
| Widowed                            | 34  | 4.3  |
| Limited social contacts            | 53  | 6.6  |
| Work related problems              | 19  | 2.4  |
| Received help from social security | 10  | 1.3  |
| Extramarital childbirth            | 84  | 10.5 |
| Number of psychosocial stressors   |     |      |
| 0 psychosocial stressor            | 149 | 18.6 |
| 1 psychosocial stressor            | 197 | 24.6 |
| 2 psychosocial stressors           | 184 | 23.0 |
| 3 psychosocial stressors           | 143 | 19.9 |
| 4 psychosocial stressors           | 69  | 8.6  |
| ≥5 psychosocial stressors          | 58  | 7.2  |

**Table 3** Number of psychosocial stressors in 1968 in relations to report of distress in 1968, 1974, 1980, 2000 and 2005

|                  | Cases, n (%) | Model 1          | Model 2          | Model 3          |
|------------------|--------------|------------------|------------------|------------------|
| Distress in 1968 | 148 (18.5)   | 1.46 (1.30-1.63) | 1.49 (1.31-1.70) | 1.61 (1.22-2.13) |
| Distress in 1974 | 161 (20.1)   | 1.31 (1.18-1.46) | 1.33 (1.17-1.50) | 1.23 (1.05-1.44) |
| Distress in 1980 | 88 (11.0)    | 1.26 (1.10-1.43) | 1.26 (1.08-1.47) | 1.22 (1.00-1.50) |
| Distress in 2000 | 49 (6.1)     | 1.41 (1.17-1.72) | 1.40 (1.13-1.74) | 1.24 (0.95-1.64) |
| Distress in 2005 | 39 (2.6)     | 1.37 (1.05-1.80) | 1.35 (1.00-1.85) | 1.50 (1.05-2.20) |

Logistic regression analyses presented as ORs with 95% CIs; Model 1 adjust for age, and; Model 2 adjust for age, education, socioeconomic status, marital status, work status at baseline (in 1968), and hypertension, CHD, stroke, diabetes mellitus, high waist-to-hip ratio, smoking and wine consumption (in 1968-80), and Model 3 adjust for age and psychiatric family history (mental illness in mother, father and/or sibling is not included in number psychosocial stressors).

**Table 4** Number of psychosocial stressors in 1968 in relation to incidence of dementia over 38 years

|                     | <b>Cases</b> | <b>Model 1</b>   | <b>Model 2</b>   | <b>Model 3</b>   | <b>Model 4</b>   |
|---------------------|--------------|------------------|------------------|------------------|------------------|
|                     | <b>n (%)</b> |                  |                  |                  |                  |
| All-type dementia   | 153 (19.1)   | 1.15 (1.05-1.27) | 1.16 (1.04-1.30) | 1.10 (1.00-1.25) | 1.13 (1.01-1.26) |
| Vascular dementia   | 35 (4.4)     | 0.94 (0.75-1.19) | 0.97 (0.75-1.26) | 0.79 (0.57-1.10) | 0.93 (0.71-1.22) |
| Alzheimer's disease | 104 (13.0)   | 1.21 (1.08-1.36) | 1.21 (1.06-1.38) | 1.16 (1.00-1.35) | 1.17 (1.02-1.33) |

Cox regression analyses presented as HRs with 95% CIs; Model 1 adjust for age; Model 2 adjust for age, education, socioeconomic status, marital status, work status at baseline (in 1968), and hypertension, CHD, stroke, diabetes mellitus, high waist-to-hip ratio, smoking, and wine consumption (in 1968-80); Model 3 adjust for age and psychiatric family history (mental illness in mother, father and/or sibling is not included in number psychosocial stressors), and; Model 4 adjust for age and longstanding distress (in 1968-80).



Common stressors in relation to longstanding distress and Alzheimer's disease

**Title page**

Title: Common psychosocial stressors in middle-aged women related to longstanding distress and increased risk of Alzheimer's disease: a 38 year longitudinal population study

Authors' names: Lena Johansson, Xinxin Guo, Tore Hällström, Maria C Norton, Margda Waern, Svante Östling, Calle Bengtsson, Ingmar Skoog

**Address for each author:** Neuropsychiatric Epidemiology Unit, Institute of Neuroscience and Physiology, Sahlgrenska Academy at Gothenburg University, Wallinsgatan 6, S-431 41 Mölndal, Sweden Lena Johansson researchers Xinxin Guo researcher, Tore Hällström professor emeritus, Margda Waern professor, Svante Östling associate professor, Ingmar Skoog professor Department of Clinical Neuroscience, Section for Psychiatry/Huddinge, Karolinska Institutet, Stockholm, Sweden Tore Hällström professor emeritus Department of Family Consumer and Human Development and Departments of Psychology, Utah State University, Logan, USA Maria Norton associate professor Sahlgrenska School of Public Health and Community Medicine, Section for Public Health Epidemiology, the Sahlgrenska Academy at University of Gothenburg, Gothenburg, Sweden Calle Bengtsson professor emeritus

**Correspondence to:** lena.johansson@neuro.gu.se

Common stressors in relation to longstanding distress and Alzheimer's disease

## Abstract

**Objective** To study the relation between psychosocial stressors, longstanding distress and incidence of dementia, in a sample of women followed from midlife to late-life.

**Design** Prospective longitudinal population study.

**Setting and Participants** The study is part of the Prospective Population Study of Women in Gothenburg, Sweden, which started in 1968 with subsequent follow-ups in 1974, 1980, 1992, 2000 and 2005. At baseline, 800 women aged 38-54 years (born in 1914, 1918, 1922 and 1930), rated 18 psychosocial stressors (e.g. divorce, widowhood, work problems and illness in relative).

**Primary and secondary outcome measures:** Symptoms of distress were measured according to a standardised question at each study wave. Dementia was diagnosed according to DSM-III-R and Alzheimer's disease (AD) according to NINCD-ADRDA.

**Results** During the 37-years follow-up 153 women developed dementia (104 of those had AD). Number of psychosocial stressors in 1968 was associated (HR, 95% CI) with higher incidence of dementia (1.15, 1.04-1.27) and AD (1.20, 1.07-1.35) between 1968 and 2005, in multivariate Cox regressions. Number of psychosocial stressors in 1968 was also associated (OR, 95% CI) with distress in 1968 (1.48, 1.32-1.67), 1974 (1.31, 1.17-1.46), 1980 (1.27, 1.11-1.45), 2000 (1.39, 1.14-1.70) and 2005 (1.35, 1.02-1.79), in multivariate logistic regressions. Number of psychosocial stressors (HR 1.17, 95% CI 1.03-1.33) and longstanding distress (1968-1974-1980) (HR 1.58, 95% CI 1.03-2.45) were independently associated with AD.

**Conclusions** Our study shows that common psychosocial stressors may have severe and longstanding physiological and psychological consequences. **However, more studies are needed to confirm these results and investigate whether more interventions such as stress**

Common stressors in relation to longstanding distress and Alzheimer's disease

1  
2  
3 management and behavioral therapy should be initiated in individuals who have experienced  
4  
5 psychosocial stressors.  
6  
7  
8  
9  
10  
11  
12  
13  
14  
15  
16  
17  
18  
19  
20  
21  
22  
23  
24  
25  
26  
27  
28  
29  
30  
31  
32  
33  
34  
35  
36  
37  
38  
39  
40  
41  
42  
43  
44  
45  
46  
47  
48  
49  
50  
51  
52  
53  
54  
55  
56  
57  
58  
59  
60

For peer review only

Common stressors in relation to longstanding distress and Alzheimer's disease

### Article summary

#### Article focus

To study the relation between psychosocial stressors, longstanding distress and incidence of dementia, in a sample of women followed over 38 years, from mid- to late-life.

#### Key messages

The study shows that the number of psychosocial stressors, measured in middle-aged women, was related to distress and incidence of AD almost four decades later.

The study also shows that the association between number of psychosocial stressors and AD was independent of longstanding perceived distress.

#### Strengths and limitations of this study

The strengths of this study include midlife report of psychosocial stressors occurring long before dementia onset, the long follow-up period, the representative population and that multiple sources of information were used to detect and diagnose dementia.

The rating of stressors was related to the last year for some stressors and at any time before 1968 for other stressors. Some stressors were of a short duration, while others were chronic and lasting for many years. We only have information on a limited number of psychosocial stressors in our population. Individuals have different capacities to cope with stress and thus react differently when exposed to the same stressor. We did not have an individual weighting of the included stressors.

Common stressors in relation to longstanding distress and Alzheimer's disease

## Introduction

Experiences of severe psychological stressors in adulthood (e.g. combat<sup>1</sup>, natural disasters<sup>2</sup> and the Holocaust<sup>3</sup>) are known to influence mental and physical health decades later. More mild psychosocial stressors are common and could be regarded as part of normal life. The long-term consequences of these more common stressors remain unclear. Epidemiological studies in the elderly with follow-ups of less than 10 years have reported that history of early parental death,<sup>4-6</sup> death of spouse<sup>7</sup> and psychosocial risk factors in childhood<sup>6</sup> increase the risk of dementia or Alzheimer's disease (AD). One explanation for the associations may be that traumatic experiences give rise to longstanding chronic distress many years after the trauma. This may lead to a cumulative burden to the brain with dysregulation in neuroendocrine systems.<sup>8-10</sup> A study among Holocaust survivors found that higher levels of stress hormones remained decades after the traumatic experiences.<sup>8</sup>

We have previously reported that longstanding distress in midlife leads to long-term consequences decades later, such as increased risk of dementia, AD<sup>11</sup> and structural brain changes<sup>12</sup>. To our knowledge, no population study has examined if number of psychosocial stressors in midlife increase the risk of dementia in late-life, and whether this is modified by longstanding distress.

The aim of this study was to examine whether common psychosocial stressors in midlife were related to distress, late-life dementia and AD, in women followed over 38 years. We further aimed to examine whether experiences of psychosocial stressors **modify** the previously reported association between longstanding midlife distress and AD.

Common stressors in relation to longstanding distress and Alzheimer's disease

## Methods

### Study population

This study is part of the Prospective Population Study of Women in Gothenburg, Sweden<sup>13 14</sup> which was initiated in 1968 with an examination of 1462 women (participation rate 90%) born in 1908, 1914, 1918, 1922 and 1930. The individuals were systematically sampled from the Swedish Population Registry based on specific birth dates in order to yield a representative sample at the ages studied. Follow-ups were performed in 1974, 1980, 1992, 2000 and 2005 with participation rates among survivors of 91%, 83%, 70%, 71% and 70% respectively. The Ethics Committee of Gothenburg University approved the study and informed consent was obtained from all participants, in accordance with the provision of the Helsinki Declaration.

The present study included a subsample of 800 women who were systematically selected for a psychiatric examination in 1968. The women were aged 38 years (n=111), 46 years (n=309), 50 years (n=290) and 54 years (n=90). Among them, 713 participated in the follow-up examination in 1974, 639 in 1980, 472 in 1992, 368 in 2000 and 296 in 2005. Losses were mainly due to death.

### Assessment of psychosocial stressors

At baseline 1968, eighteen predefined psychosocial stressors were asked and rated by a psychiatrist during the psychiatric examination. These included: divorce, widowhood, serious problem in children (e.g. physical illness, death and abuse), extramarital childbirth, mental illness in spouse or first degree relative, alcohol abuse in spouse or first degree relative, physical illness or social problems related to husband, receiving help from social-security, problem related to husband's or own work (e.g. lost work) and limited social network. Some

1  
2  
3  
4  
5  
6  
7  
8  
9  
10  
11  
12  
13  
14  
15  
16  
17  
18  
19  
20  
21  
22  
23  
24  
25  
26  
27  
28  
29  
30  
31  
32  
33  
34  
35  
36  
37  
38  
39  
40  
41  
42  
43  
44  
45  
46  
47  
48  
49  
50  
51  
52  
53  
54  
55  
56  
57  
58  
59  
60

Common stressors in relation to longstanding distress and Alzheimer's disease of the stressors (physical illness, mental illness and alcohol abuse in spouse; serious problem and mental illness in child; work related problems and limited social network) were rated in the last year before examination in 1968. The others were rated as occurring at any time prior to the examination in 1968.

### Assessment of distress

Symptoms of distress were rated according to a standardized question in 1968, 1974, 1980, 2000 and 2005. The question was worded identically at each examination; "Have you experienced any period of distress (one month or longer) in relation to circumstances in everyday life, such as work, health or family situation? Distress refers to feelings of irritability, tension, nervousness, fear, anxiety or sleep disturbances." Participants were asked to choose between; 0=Have never experienced any period of distress; 1=Have experienced period/s of distress more than five years ago; 2=Have experienced one period of distress during the last five years; 3=Have experienced several periods of distress during the last five years; 4=Have experienced constant distress during the last year; or 5=Have experienced constant distress during the last five years. In the present study, distress is defined as a rating of 3 to 5.

### Psychiatric examinations

The psychiatric examinations were performed in 1968, 1974, 1980 and 1992 by psychiatrists and in 2000 and 2005 by experienced psychiatric research nurses. The examinations were semi-structured and included a comprehensive neuropsychiatric examination and an extensive battery of neuropsychiatric tests.<sup>15</sup> Close informant interviews were performed in 1992, 2000 and 2005. These included questions about changes in behaviour and intellectual functions and, in cases of dementia, age of onset and disease course.<sup>15</sup> Medical records were collected

1 Common stressors in relation to longstanding distress and Alzheimer's disease  
2  
3 from all inpatient and outpatient departments and general practitioners' offices in Gothenburg.  
4  
5 The Swedish Hospital Discharge Registry provided diagnostic information for all individuals  
6  
7 discharged from hospitals on a nationwide basis since 1978.  
8  
9

### 10 11 **Diagnosis of dementia**

12  
13 The diagnosis of dementia was based on information from psychiatric examinations, close  
14  
15 informant interviews, medical record examinations and the Swedish Hospital Discharge  
16  
17 Registry. The diagnostic procedures have been described in detail previously.<sup>15</sup> Dementia  
18  
19 diagnosis at each examination was made according to the Diagnostic and Statistical Manual of  
20  
21 Mental Disorders (DSM-III-R) based on the combined information from the psychiatric  
22  
23 examination and the close informant interview. Dementia diagnoses for individuals lost to  
24  
25 follow-up were based on information from medical records evaluated by geriatric  
26  
27 psychiatrists in consensus conferences, and information from the Swedish Hospital Discharge  
28  
29 Registry.<sup>16</sup>  
30  
31  
32  
33  
34  
35

36 AD was diagnosed according to the criteria of the National Institute of Neurological and  
37  
38 Communicative Disorders and Stroke and the Alzheimer's Disease and Related Disorders  
39  
40 Association (NINCDS-ADRDA).<sup>17</sup> The criteria for vascular dementia (VaD) were similar to  
41  
42 the criteria proposed by the National Institute of Neurological Disorders and Stroke and the  
43  
44 Association Internationale pour la Recherche et l'Enseignement en Neurosciences (NINDS-  
45  
46 AIREN).<sup>18</sup> VaD was thus diagnosed when there was a temporal relationship (within 1 year)  
47  
48 between a history of acute focal neurological symptoms and signs (hemiparesis or motor  
49  
50 aphasia) and the first symptoms of dementia. Other dementias were diagnosed when other  
51  
52 causes were likely to have caused the dementia. Person-years were calculated from the date of  
53  
54 the baseline examination to (a) the time of dementia onset; (b) the date of death; (c) the date  
55  
56  
57  
58  
59  
60



Common stressors in relation to longstanding distress and Alzheimer's disease

of the last follow-up examination for participants in 2005; or (d) December 31, 2006 for surviving drop-outs.

### Potential confounders and mediators

Information on education, socioeconomic status, marital status and work status was obtained at the examination in 1968, and information on blood pressure, antihypertensive medication use, coronary heart disease (CHD), diabetes mellitus, stroke, waist and hip circumferences, cigarette smoking and wine consumption was obtained at the examinations in 1968, 1974 and 1980. Education was dichotomised as compulsory (6 years for those born 1914-1922 and 7 years for those born 1930) versus more than compulsory education. Socioeconomic status was based on husband's occupation for married women, and own occupation for unmarried women and was defined as higher middle, lower middle, skilled workers and unskilled workers.<sup>19</sup> Marital status was classified as married and/or co-habiting versus single. Work status was measured as full-time work and/or part-time work versus no work outside home. Hypertension was defined as systolic blood pressure of 160 mmHg or more, and/or diastolic blood pressure 95 mmHg or more and/or taking antihypertensive medication. CHD was defined as angina pectoris according to the Rose criteria<sup>20</sup> or documented history of myocardial infarction. Diabetes mellitus was defined as a diagnosis told by a doctor, death certificates, being on anti-diabetes drugs or having two fasting blood glucose values of 7.0 mmol/l or more. Stroke was diagnosed based on information from the examinations and the Swedish Hospital Discharge Registry. High waist-to-hip ratio was defined as a ratio of waist and hip circumferences over 0.85. Cigarette smoking was defined as never, former or current smoker. Wine consumption was classified as none, less than once weekly and once weekly or more.

Common stressors in relation to longstanding distress and Alzheimer's disease

### Statistical analyses

Logistic regressions were used to analyse the associations between number of psychosocial stressors in 1968 and report of distress in 1968, 1974, 1980, 2000 and 2005. The results are presented as odds ratios (ORs) and 95% confidence intervals (CIs) in three separate models. The 1<sup>st</sup> model adjusts for age only. The 2<sup>nd</sup> model adjusts for age, education, socioeconomic status, marital status, work status, hypertension, CHD, stroke, diabetes mellitus, waist-to-hip ratio, smoking and wine consumption. The 3<sup>rd</sup> model adjusts for age and psychiatric family history, i.e. mental illness in mother, father and/or sibling. (These three variables were then not counted as psychosocial stressors).

Cox regressions were used to study the associations between number of psychosocial stressors and incidence of dementia and dementia subtypes. Associations are presented as hazard ratios (HRs) and 95% CIs, and model 1-3 adjust for the same covariates as listed above. The 4<sup>th</sup> model adjusts for age and longstanding midlife distress (i.e. distress in all examinations 1968-1974-1980). Two interaction models were also added; (1) number of stressors\*psychiatric family in relation to AD and (2) number of stressors\*longstanding distress in relation to AD. Finally, we examined the associations between longstanding midlife distress and psychosocial stressors in relation to AD before and after age 75.

### Results

Characteristics of the 800 participants are given in Table 1. The proportion of women who reported specific life stressors in 1968 are shown in Table 2. Twenty-five percent of the women reported one psychosocial stressor, 23% reported two stressors, 20% three stressors and 16% four or more stressors. The most frequently reported psychosocial stressor was mental illness in first degree relative (mother 27 %, father 19% and sibling 32%).

Common stressors in relation to longstanding distress and Alzheimer's disease

1  
2  
3  
4  
5 Four hundred and twenty five participants died during follow-up (mean age 79 years). From  
6  
7 1968 to 2006, 153 (19.1%) women developed dementia during 25,131 person-years of follow-  
8  
9 up, including 104 with AD, 35 with VaD and 14 with other dementias. The mean time from  
10  
11 the baseline examination in 1968 to dementia onset was 29 years (26 had dementia onset  
12  
13 before 1992, 73 between 1992 and 2000 and 54 after 2000). Mean age of dementia onset was  
14  
15 78 years (45 had dementia onset before age 75 years and 108 after age 75 years).  
16  
17  
18  
19

20  
21 Number of psychosocial stressors in 1968 was associated with distress in 1968, 1974, 1980,  
22  
23 2000 and 2005, after adjustment for potential confounders (Table 3). ORs were similar after  
24  
25 further adjustment for psychiatric family history in model 3. Number of psychosocial stressors  
26  
27 was associated with longstanding midlife distress (i.e. distress in 1968-1974-1980) both in  
28  
29 later born cohorts, born 1922 and 1930, (multiadjusted OR 1.32, 95% CI 1.14-1.52) and  
30  
31 earlier born cohorts, born 1914 and 1918 (multiadjusted OR 1.58, 95% CI 1.30-1.94).  
32  
33  
34  
35

36  
37 Number of psychosocial stressors in 1968 was associated with higher incidence of AD (HR  
38  
39 1.21, 95% CI 1.08-1.36) and all-type dementia (HR 1.15, 95% CI 1.05-1.27) (Table 4). The  
40  
41 associations remained after adjusting for multiple confounders in model 2, psychiatric family  
42  
43 history in model 3 and longstanding distress (i.e. distress in 1968-1974-1980) in model 4. In  
44  
45 the 4<sup>th</sup> model, longstanding distress (HR 1.58, 95% CI 1.01-2.46) and number of psychosocial  
46  
47 stressors (HR 1.17, 95% CI 1.02-1.33) were independently associated with AD. There were  
48  
49 no interactions between number of stressors and psychiatric family history in relation to AD  
50  
51 (age adjusted HR 1.05, 95% CI 0.75-1.45, p=0.79) or between number of stressors and  
52  
53 longstanding distress in relation to AD (age adjusted HR 1.04, 95% CI 0.77-1.40, p=0.82).  
54  
55

56 The association between number of psychosocial stressors and incidence of AD were similar  
57  
58  
59  
60

1 Common stressors in relation to longstanding distress and Alzheimer's disease  
2  
3 in those with early onset AD (aged <75 years) (multiadjusted HR 1.25, 95% CI 1.02-1.54)  
4  
5 and late onset AD (aged  $\geq$ 75 years) (multiadjusted HR 1.19, 95% CI 1.03-1.38). There were  
6  
7 no visible associations between number of psychosocial stressors and VaD in any of the  
8  
9 models.  
10  
11  
12  
13

## 14 Discussion

15  
16 We found that number of common psychosocial stressors in midlife was associated with  
17  
18 incidence of late-life dementia, especially AD, in a population-based sample of women  
19  
20 followed for 38 years. The associations remained when controlling for longstanding distress.  
21  
22 We also found that number of psychosocial stressors in 1968 was related to increased level of  
23  
24 distress at every examination conducted between 1968 and 2005.  
25  
26  
27  
28

29 We have previously reported that longstanding distress in midlife increase risk of AD<sup>11</sup> and  
30  
31 structural brain changes.<sup>12</sup> These findings are now extended by showing that number of  
32  
33 psychosocial stressors and report of distress independently predicted AD, i.e. increased  
34  
35 distress could not completely explain the association between midlife stressors and dementia.  
36  
37 One reason for this is that individuals respond differently to psychosocial stressors. Thus,  
38  
39 biological responses may develop in connection with psychosocial stressors also in  
40  
41 individuals who do not experience or report increased distress in association to the stressor.  
42  
43  
44  
45  
46

47 There may be several biological explanations for the association between psychosocial  
48  
49 stressors in midlife and dementia. One is related to the stress hypothesis. Stress may cause a  
50  
51 number of physiological reactions in the central nervous, endocrine, immune and  
52  
53 cardiovascular systems.<sup>10 21</sup> Thus, psychological stress has been reported to increase the  
54  
55 activity of the hypothalamic-pituitary-adrenal axis and the levels of glucocorticoid  
56  
57  
58  
59  
60

Common stressors in relation to longstanding distress and Alzheimer's disease

hormones,<sup>22</sup> cause structural and functional damage to the hippocampus,<sup>22</sup> influence learning and memory processes,<sup>23</sup> increase the production of pro-inflammatory cytokines in the brain,<sup>10</sup> increase the deposition of  $\beta$ -amyloid peptid and tau-protein in the brain<sup>24-26</sup> and to increase the frequency of cardiovascular disease<sup>27,28</sup>, and hypertension.<sup>29</sup> All these factors have been linked to dementia.<sup>30</sup>

The associations between psychosocial stressors reported in midlife and perceived distress later in life was consistent through all follow-up years, as indicated by ORs of similar magnitude. Thus, even common psychosocial stressors (related to work and family) can cause distress over several decades. Our finding is supported by studies reporting that stress-hormones may remain elevated many years after traumatic events.<sup>8</sup> Another explanation is that experiences of psychosocial traumas might make an individual more vulnerable to future stressors due to biological changes and dysfunctional stress coping mechanisms.<sup>31,32</sup>

### **Strengths and weaknesses of the study**

The strengths of this study include midlife report of psychosocial stressors occurring long before dementia onset, the long follow-up period, the representative population and that multiple sources of information were used to detect and diagnose dementia. Some methodological issues need to be considered. First, the rating of stressors was related to the last year for some stressors and at any time before 1968 for other stressors. However, both these were related to the outcome in a similar way (data not shown). Second, some stressors were of a short duration, while others were chronic and lasting for many years. In addition, some stressors were severe and others more trivial. This might give an unbalanced weight among the factors studied. Third, we only have information on a limited number of psychosocial stressors in our population. Some events were not included, e.g. physical abuse

Common stressors in relation to longstanding distress and Alzheimer's disease

and own severe physical illness. The relationships might thus have been confounded by unmeasured factors. However, it is not likely that this had any major influence on our findings. Fourth, individuals have different capacities to cope with stress and thus react differently when exposed to the same stressor. We did not have an individual weighting of the included stressors. If anything, this might have decreased the strengths of associations. Fifth, some stressors are interrelated, for example mental illness and alcohol abuse in spouse. However these stressors independently increased stress reactions (data not shown). We therefore decided not to merge them. Sixth, distress in our study was based on self-report and we did not include an objective measure of stress reactions. However, most epidemiological studies use subjective report to assess stress or distress. Seventh, there are a number of risk factors occurring between baseline and development of dementia and these might potentially modify the association between common psychosocial stressors in midlife and dementia. However, these risk factors would most likely decrease the possibility to find associations in a study with long follow-up, as may exert competing risk, and controlling for future factors might lead to an over-adjustment. Eighth, psychiatric family history may have an impact on the predisposition to distress and dementia. However, after adjust for psychiatric family history (i.e. mental illness in mother, father and/or sibling) the associations between number of stressors was still associated with both longstanding distress, AD and all-type dementia.

Ninth, cumulative attrition is a problem in long-term follow-up studies. While this problem was, to some extent, alleviated by using medical records and the hospital registry data to diagnose dementia in those lost to follow-up, these sources probably underestimate the number of dementia cases. It should be noted, however, that almost all people in Sweden received their hospital treatment within the public health care system during the time of the study and that the Swedish Hospital Discharge Register covers the entire country.

Furthermore, the number of demented women detected in the different age groups is what

1 Common stressors in relation to longstanding distress and Alzheimer's disease  
2  
3 could be expected from other incidence studies.<sup>33</sup> Finally, it is difficult to diagnose dementia  
4  
5 subtypes on clinical grounds alone. Individuals with AD often have cerebrovascular disease  
6  
7 and individuals with VaD often have concomitant AD pathology. Furthermore,  
8  
9 cerebrovascular disease may influence the presence and severity of clinical symptoms of AD,  
10  
11 and vice versa.<sup>34</sup> It is thus often difficult to make a clear distinction between AD and VaD in  
12  
13 patients with a history of stroke or cerebrovascular disease, both on clinical grounds and at  
14  
15 autopsy, and mixed types are probably common.  
16  
17  
18  
19

## 20 **Conclusion**

21  
22 To conclude, psychosocial stressors in midlife were associated with incidence of AD and  
23  
24 longstanding distress, over several decades. This suggests that common psychosocial stressors  
25  
26 may have severe and longstanding physiological and psychological consequences. However,  
27  
28 more studies are needed to confirm these results and investigate whether more interventions  
29  
30 such as stress management and behavioral therapy should be initiated in individuals who have  
31  
32 experienced psychosocial stressors.  
33  
34  
35  
36  
37

## 38 **Acknowledgement**

39  
40 The authors thank all members of the Prospective Population Study of Women in Gothenburg  
41  
42 study groups for their cooperation in data collection and management and Valter Sundh for  
43  
44 statistical assistance.  
45  
46  
47  
48  
49  
50  
51  
52  
53  
54  
55  
56  
57  
58  
59  
60

Common stressors in relation to longstanding distress and Alzheimer's disease

## References

1. Bremner JD, Randall P, Scott TM, Bronen RA, Seibyl JP, Southwick SM, et al. MRI-based measurement of hippocampal volume in patients with combat-related posttraumatic stress disorder. *Am J Psychiatry* 1995;152(7):973-81.
2. Sezgin U, Punamaki RL. Earthquake trauma and causal explanation associating with PTSD and other psychiatric disorders among South East Anatolian women. *J Affect Disord* 2012.
3. Yehuda R, Bierer LM, Schmeidler J, Aferiat DH, Breslau I, Dolan S. Low cortisol and risk for PTSD in adult offspring of holocaust survivors. *Am J Psychiatry* 2000;157(8):1252-9.
4. Norton MC, Ostbye T, Smith KR, Munger RG, Tschanz JT. Early parental death and late-life dementia risk: findings from the Cache County Study. *Age Ageing* 2009;38(3):340-3.
5. Norton MC, Smith KR, Ostbye T, Tschanz JT, Schwartz S, Corcoran C, et al. Early parental death and remarriage of widowed parents as risk factors for Alzheimer disease: the Cache County study. *Am J Geriatr Psychiatry* 2011;19(9):814-24.
6. Persson G, Skoog I. A prospective population study of psychosocial risk factors for late onset dementia. *Int J Geriatr Psych* 1996;11(1):15-22.
7. Tsolaki M, Papaliagkas V, Kounti F, Messini C, Boziki M, Anogianakis G, et al. Severely stressful events and dementia: a study of an elderly Greek demented population. *Psychiatry Res* 2010;176(1):51-4.
8. Yehuda R, Golier JA, Harvey PD, Stavitsky K, Kaufman S, Grossman RA, et al. Relationship between cortisol and age-related memory impairments in Holocaust survivors with PTSD. *Psychoneuroendocrinology* 2005;30(7):678-87.
9. Cacioppo JT, Burleson MH, Poehlmann KM, Malarkey WB, Kiecolt-Glaser JK, Berntson GG, et al. Autonomic and neuroendocrine responses to mild psychological stressors: effects of chronic stress on older women. *Ann Behav Med* 2000;22(2):140-8.
10. Leonard BE. HPA and immune axes in stress: involvement of the serotonergic system. *Neuroimmunomodulation* 2006;13(5-6):268-76.
11. Johansson L, Guo X, Waern M, Ostling S, Gustafson D, Bengtsson C, et al. Midlife psychological stress and risk of dementia: a 35-year longitudinal population study. *Brain* 2010;133(Pt 8):2217-24.
12. Johansson L, Skoog I, Gustafson DR, Olesen PJ, Waern M, Bengtsson C, et al. Midlife psychological distress associated with late-life brain atrophy and white matter lesions: a 32-year population study of women. *Psychosom Med* 2012;74(2):120-5.
13. Bengtsson C, Blohme G, Hallberg L, Hallstrom T, Isaksson B, Korsan-Bengtson K, et al. The study of women in Gothenburg 1968-1969--a population study. General design, purpose and sampling results. *Acta Med Scand* 1973;193(4):311-8.
14. Lissner L, Skoog I, Andersson K, Beckman N, Sundh V, Waern M, et al. Participation bias in longitudinal studies: experience from the Population Study of Women in Gothenburg, Sweden. *Scand J Prim Health Care* 2003;21(4):242-7.
15. Skoog I, Nilsson L, Palmertz B, Andreasson LA, Svanborg A. A population-based study of dementia in 85-year-olds. *N Engl J Med* 1993;328(3):153-8.
16. Guo X, Waern M, Sjogren K, Lissner L, Bengtsson C, Bjorkelund C, et al. Midlife respiratory function and Incidence of Alzheimer's disease: a 29-year longitudinal study in women. *Neurobiol Aging* 2007;28(3):343-50.
17. Criteria for the clinical diagnosis of Alzheimer's disease. Excerpts from the NINCDS-ADRDA Work Group report. *J Am Geriatr Soc* 1985;33(1):2-3.



## Common stressors in relation to longstanding distress and Alzheimer's disease

18. Roman GC, Tatemichi TK, Erkinjuntti T, Cummings JL, Masdeu JC, Garcia JH, et al. Vascular dementia: diagnostic criteria for research studies. Report of the NINDS-AIREN International Workshop. *Neurology* 1993;43(2):250-60.
19. Carlsson G. *Socialgruppering. Social mobility and class structure.* , 1958.
20. Rose GA. The diagnosis of ischaemic heart pain and intermittent claudication in field surveys. *Bull World Health Organ* 1962;27:645-58.
21. Buckley T, Sunari D, Marshall A, Bartrop R, McKinley S, Tofler G. Physiological correlates of bereavement and the impact of bereavement interventions. *Dialogues Clin Neurosci* 2012;14(2):129-39.
22. Sapolsky RM. Why stress is bad for your brain. *Science* 1996;273(5276):749-50.
23. Csernansky JG, Dong H, Fagan AM, Wang L, Xiong C, Holtzman DM, et al. Plasma cortisol and progression of dementia in subjects with Alzheimer-type dementia. *Am J Psychiatry* 2006;163(12):2164-9.
24. Dong H, Goico B, Martin M, Csernansky CA, Bertchume A, Csernansky JG. Modulation of hippocampal cell proliferation, memory, and amyloid plaque deposition in APPsw (Tg2576) mutant mice by isolation stress. *Neuroscience* 2004;127(3):601-9.
25. Kang JE, Cirrito JR, Dong H, Csernansky JG, Holtzman DM. Acute stress increases interstitial fluid amyloid-beta via corticotropin-releasing factor and neuronal activity. *Proc Natl Acad Sci U S A* 2007;104(25):10673-8.
26. Green KN, Billings LM, Roozendaal B, McGaugh JL, LaFerla FM. Glucocorticoids increase amyloid-beta and tau pathology in a mouse model of Alzheimer's disease. *J Neurosci* 2006;26(35):9047-56.
27. Pickering TG. Mental stress as a causal factor in the development of hypertension and cardiovascular disease. *Curr Hypertens Rep* 2001;3(3):249-54.
28. Folkow B, Hallback M, Weiss L. Cardiovascular responses to acute mental "stress" in spontaneously hypertensive rats. *Clin Sci Mol Med Suppl* 1973;45 Suppl 1:131s-3.
29. Sparrenberger F, Cicheler FT, Ascoli AM, Fonseca FP, Weiss G, Berwanger O, et al. Does psychosocial stress cause hypertension? A systematic review of observational studies. *J Hum Hypertens* 2009;23(1):12-9.
30. Skoog I, Kalaria RN, Breteler MM. Vascular factors and Alzheimer disease. *Alzheimer Dis Assoc Disord* 1999;13 Suppl 3:S106-14.
31. McFarlane AC, Yehuda R, Clark CR. Biologic models of traumatic memories and post-traumatic stress disorder. The role of neural networks. *Psychiatr Clin North Am* 2002;25(2):253-70, v.
32. Westerlund H, Gustafsson PE, Theorell T, Janlert U, Hammarstrom A. Social adversity in adolescence increases the physiological vulnerability to job strain in adulthood: a prospective population-based study. *PLoS One* 2012;7(4):e35967.
33. Fratiglioni L, Launer LJ, Andersen K, Breteler MM, Copeland JR, Dartigues JF, et al. Incidence of dementia and major subtypes in Europe: A collaborative study of population-based cohorts. Neurologic Diseases in the Elderly Research Group. *Neurology* 2000;54(11 Suppl 5):S10-5.
34. Snowdon DA, Greiner LH, Mortimer JA, Riley KP, Greiner PA, Markesbery WR. Brain infarction and the clinical expression of Alzheimer disease. The Nun Study. *JAMA* 1997;277(10):813-7.

## Common stressors in relation to longstanding distress and Alzheimer's disease

**Table 1** Characteristics of the study sample (N=800)

|                                      | N   | %    |
|--------------------------------------|-----|------|
| Birth year (age)                     |     |      |
| 1914 (54 year)                       | 89  | 11.1 |
| 1918 (50 year)                       | 291 | 36.4 |
| 1922 (46 year)                       | 309 | 38.6 |
| 1930 (38 year)                       | 111 | 13.9 |
| Education <sup>a</sup>               |     |      |
| Compulsory                           | 600 | 75.0 |
| More than compulsory                 | 200 | 25.0 |
| Socioeconomic status <sup>a</sup>    |     |      |
| Upper middle                         | 161 | 20.2 |
| Lower middle                         | 267 | 33.4 |
| Skilled workers                      | 209 | 26.1 |
| Unskilled workers                    | 163 | 20.4 |
| Marital status <sup>a</sup>          |     |      |
| Married                              | 638 | 79.8 |
| Co-habited (not married)             | 94  | 11.7 |
| Living alone (not married)           | 68  | 8.5  |
| Work status <sup>a</sup>             |     |      |
| Full-time work                       | 270 | 33.8 |
| Part-time work                       | 258 | 32.3 |
| No work outside home                 | 272 | 34.0 |
| Hypertension <sup>b</sup>            | 144 | 18.0 |
| Coronary heart disease <sup>b</sup>  | 74  | 9.3  |
| Diabetes mellitus <sup>b</sup>       | 24  | 3.0  |
| Stroke <sup>b</sup>                  | 5   | 0.5  |
| Smoking <sup>b</sup>                 | 341 | 42.6 |
| Wine consumption <sup>b</sup>        | 246 | 30.8 |
| High waist-to-hip ratio <sup>b</sup> | 210 | 26.3 |

<sup>a</sup>Measured in 1968, <sup>b</sup>Measured in 1968, 1974 and 1980

## Common stressors in relation to longstanding distress and Alzheimer's disease

**Table 2** Prevalence of psychosocial stressors in women in 1968 (N=800)

|                                    | N   | %    |
|------------------------------------|-----|------|
| Physical illness in spouse         | 62  | 7.8  |
| Mental illness in spouse           | 98  | 12.3 |
| Alcohol abuse in spouse            | 55  | 6.9  |
| Social problem in spouse           | 81  | 10.1 |
| Work related problems in spouse    | 32  | 4.0  |
| Serious problem in children        | 70  | 8.8  |
| Mental illness in child            | 139 | 17.4 |
| Mental illness in father           | 151 | 18.9 |
| Alcohol abuse in father            | 100 | 12.5 |
| Mental illness in mother           | 212 | 26.5 |
| Mental illness in sibling          | 255 | 31.9 |
| Alcohol abuse in sibling           | 79  | 9.9  |
| Divorced                           | 65  | 8.1  |
| Widowed                            | 34  | 4.3  |
| Limited social contacts            | 53  | 6.6  |
| Work related problems              | 19  | 2.4  |
| Received help from social security | 10  | 1.3  |
| Extramarital childbirth            | 84  | 10.5 |
| Number of psychosocial stressors   |     |      |
| 0 psychosocial stressor            | 149 | 18.6 |
| 1 psychosocial stressor            | 197 | 24.6 |
| 2 psychosocial stressors           | 184 | 23.0 |
| 3 psychosocial stressors           | 143 | 19.9 |
| 4 psychosocial stressors           | 69  | 8.6  |
| ≥5 psychosocial stressors          | 58  | 7.2  |

**Table 3** Number of psychosocial stressors in 1968 in relations to report of distress in 1968, 1974, 1980, 2000 and 2005

|                  | Cases, n (%) | Model 1          | Model 2          | Model 3          |
|------------------|--------------|------------------|------------------|------------------|
| Distress in 1968 | 148 (18.5)   | 1.46 (1.30-1.63) | 1.49 (1.31-1.70) | 1.61 (1.22-2.13) |
| Distress in 1974 | 161 (20.1)   | 1.31 (1.18-1.46) | 1.33 (1.17-1.50) | 1.23 (1.05-1.44) |
| Distress in 1980 | 88 (11.0)    | 1.26 (1.10-1.43) | 1.26 (1.08-1.47) | 1.22 (1.00-1.50) |
| Distress in 2000 | 49 (6.1)     | 1.41 (1.17-1.72) | 1.40 (1.13-1.74) | 1.24 (0.95-1.64) |
| Distress in 2005 | 39 (2.6)     | 1.37 (1.05-1.80) | 1.35 (1.00-1.85) | 1.50 (1.05-2.20) |

Logistic regression analyses presented as ORs with 95% CIs; Model 1 adjust for age, and; Model 2 adjust for age, education, socioeconomic status, marital status, work status at baseline (in 1968), and hypertension, CHD, stroke, diabetes mellitus, high waist-to-hip ratio, smoking and wine consumption (in 1968-80), and Model 3 adjust for age and psychiatric family history (mental illness in mother, father and/or sibling is not included in number psychosocial stressors).

**Table 4** Number of psychosocial stressors in 1968 in relation to incidence of dementia over 38 years

|                     | Cases      | Model 1          | Model 2          | Model 3          | Model 4          |
|---------------------|------------|------------------|------------------|------------------|------------------|
|                     | n (%)      |                  |                  |                  |                  |
| All-type dementia   | 153 (19.1) | 1.15 (1.05-1.27) | 1.16 (1.04-1.30) | 1.10 (1.00-1.25) | 1.13 (1.01-1.26) |
| Vascular dementia   | 35 (4.4)   | 0.94 (0.75-1.19) | 0.97 (0.75-1.26) | 0.79 (0.57-1.10) | 0.93 (0.71-1.22) |
| Alzheimer's disease | 104 (13.0) | 1.21 (1.08-1.36) | 1.21 (1.06-1.38) | 1.16 (1.00-1.35) | 1.17 (1.02-1.33) |

Cox regression analyses presented as HRs with 95% CIs; Model 1 adjust for age; Model 2 adjust for age, education, socioeconomic status, marital status, work status at baseline (in 1968), and hypertension, CHD, stroke, diabetes mellitus, high waist-to-hip ratio, smoking, and wine consumption (in 1968-80); Model 3 adjust for age and psychiatric family history (mental illness in mother, father and/or sibling is not included in number psychosocial stressors), and; Model 4 adjust for age and longstanding distress (in 1968-80).
